# Supplementary material for: The Arabidopsis V-ATPase is localized to the TGN/EE via a seed plant-specific motif
Source: eLife. 2020 Nov 25;9:e60568. doi: 10.7554/eLife.60568 (PMC7717909; doi:10.7554/eLife.60568)
Supplement: Figure 2—source data 1. [file elife-60568-fig2-data1.xlsx]

## Sheet: Sheet1
			1	2	3	4	5	6	7	8	9	10	Mean	Std deviation
	Tetraspec beads	Pearsons	0.958	0.956	0.951	0.952	0.938	0.96	0.95	0.958	0.96	0.953	0.9536	0.00660303
		Manders 1	0.999	0.996	0.999	0.999	0.998	1	0.999	0.999	0.999	0.999	0.9987	0.00105935
		Manders 2	0.927	0.946	0.938	0.936	0.929	0.941	0.939	0.941	0.936	0.939	0.9372	0.00565292
	Tetraspec rotated 90°	Pearsons	-0.011	0.01	0.025	-0.006	-0.007	-0.007	-0.007	0.005	-0.016	0.012	-0.0002	0.0127087
		Manders 1	0.001	0.03	0.054	0.019	0	0.009	0	0.035	0.024	0.04	0.0212	0.0187546
		Manders 2	0.003	0.05	0.049	0.034	0	0.017	0	0.055	0.045	0.068	0.0321	0.025221
	VHA-a1-GFP + VHA-a1-RFP	Pearsons	0.867	0.819	0.86	0.819	0.888	0.805	0.83	0.787	0.877	0.877	0.8429	0.0351234
		Manders 1	0.918	0.806	0.908	0.867	0.895	0.859	0.891	0.837	0.949	0.924	0.8854	0.0433518
		Manders 2	0.871	0.77	0.819	0.779	0.853	0.729	0.72	0.739	0.777	0.801	0.7858	0.050802
	E156Q	Pearsons	0.205	0.245	0.239	0.427	0.284	0.251	0.181	0.339	0.363	0.255	0.2789	0.0758514
		Manders 1	0.268	0.496	0.386	0.596	0.641	0.54	0.55	0.628	0.622	0.561	0.5288	0.118663
		Manders 2	0.038	0.2	0.123	0.245	0.379	0.198	0.148	0.173	0.321	0.201	0.2026	0.0967531
	E161S	Pearsons	0.847	0.861	0.726	0.812	0.831	0.835	0.806	0.834	0.846	0.809	0.8207	0.0377714
		Manders 1	0.895	0.912	0.795	0.922	0.947	0.945	0.978	0.953	0.918	0.919	0.9184	0.0495585
		Manders 2	0.761	0.773	0.678	0.73	0.675	0.77	0.606	0.696	0.662	0.614	0.6965	0.061036
	F134Y	Pearsons	0.758	0.717	0.742	0.567	0.54	0.791	0.622	0.738	0.594	0.723	0.6792	0.0894139
		Manders 1	0.831	0.801	0.858	0.772	0.763	0.926	0.769	0.891	0.742	0.84	0.8193	0.0604024
		Manders 2	0.715	0.599	0.595	0.584	0.555	0.722	0.708	0.661	0.59	0.672	0.6401	0.0623653
	L159T	Pearsons	0.479	0.563	0.417	0.357	0.302	0.436	0.428	0.419	0.443	0.639	0.4483	0.0958205
		Manders 1	0.537	0.645	0.654	0.55	0.649	0.607	0.657	0.605	0.741	0.742	0.6387	0.0684772
		Manders 2	0.594	0.669	0.486	0.379	0.513	0.368	0.352	0.589	0.447	0.689	0.5086	0.123577
	E156Q + L159T	Pearsons	0.045	0.082	0.126	0.127	0.081	0.09	0.127	0.056	0.054	0.126	0.0914	0.0332205
		Manders 1	0.485	0.558	0.576	0.59	0.469	0.531	0.588	0.524	0.533	0.582	0.5436	0.0428309
		Manders 2	0.108	0.088	0.093	0.104	0.048	0.12	0.144	0.099	0.132	0.123	0.1059	0.0269132
	L159T + E161S	Pearsons	0.459	0.347	0.58	0.534	0.41	0.352	0.567	0.389	0.432	0.486	0.4556	0.0846997
		Manders 1	0.597	0.563	0.729	0.705	0.709	0.576	0.763	0.708	0.576	0.474	0.64	0.0943904
		Manders 2	0.649	0.543	0.598	0.606	0.456	0.466	0.694	0.441	0.57	0.639	0.5662	0.0878734
	E156Q + L159T + E161S (ELE)	Pearsons	0.418	0.203	0.318	0.222	0.284	0.372	0.324	0.326	0.31		0.308556	0.0669648
		Manders 1	0.703	0.493	0.554	0.596	0.517	0.537	0.544	0.538	0.534		0.557333	0.0612372
		Manders 2	0.262	0.201	0.251	0.302	0.409	0.354	0.465	0.253	0.306		0.311444	0.0842157
	delta EEI	Pearsons	0.379	0.34	0.18	0.316	0.423	0.314	0.234	0.269	0.268	0.343	0.3066	0.0711621
		Manders 1	0.691	0.623	0.58	0.509	0.658	0.473	0.472	0.57	0.558	0.494	0.5628	0.0770495
		Manders 2	0.388	0.466	0.42	0.522	0.634	0.531	0.55	0.46	0.431	0.67	0.5072	0.0923421
