# Supplementary material for: The Arabidopsis V-ATPase is localized to the TGN/EE via a seed plant-specific motif
Source: eLife. 2020 Nov 25;9:e60568. doi: 10.7554/eLife.60568 (PMC7717909; doi:10.7554/eLife.60568)
Supplement: Figure 4—source data 1. [file elife-60568-fig4-data1.xlsx]

## Sheet: Sheet1
VHA-a3-GFP		E156Q + L159T		E156Q + L159T +E161S (ELE)		delta EEI
DMSO	Dex	DMSO	Dex	DMSO	Dex	DMSO	Dex
139.122	137.196	205	173.319	55.833	255	104.069	202.764
154.429	195	223.182	174.375	71	255	157.615	199
90.42	189.095	171	180.5	62.981	207.4	146.25	184
103.142	183.222	205.588	170	88	171	142	128.272
101	111.667	182.271	201.299	85	76.786	135.642	206
82.376	199.407	227	213	72.73	117.526	176.24	131.25
166.923	197.671	255	156	74.744	112.299	154.702	171
122.237	199.625	167.183	227	91.222	135.239	193.236	149.685
91.34	123.363	242	109.351	124.306	142	179.68	180.4
102.31	105.161	185	185	80.982	116.906	198.75	170
119.462	238.385	168.31	162.685	51.692	109.046	148.512	184
146.8	140.696	227.5	177.818	119.48	170	111.247	166.131
130.921	225	205.189	150.851	87.32	99	121.6	155.722
160.421	166.776	156	179.8	68.153	99.189	108.356	155.074
111.333	175.293	215.778	213	140.945	114.331	99	220.598
143.02	137.424	186.132	222	74.545	170.333	184.127	206
145.98	165.909	203.429	174.912	72.63	156	255	218.571
148.365	159.34	255	170	128	187.691	129.116	205.25
119.078	113.526	255	184.2	56.484	165.977	193.2	198.565
110.195	145.353	227	157.583	85.094	191.879	197.5	194.74
127.4	163	201.5	163.066	115.492	173.321	174.667	198
109.154	169.642	166.611	213.617	112.837	142	176.737	185.554
110.081	149	242	130.548	61.142	176.667	199	118.588
166.733	159.938	213.131	201.593	103.325	236.333	156	139.121
107.567	157	225.815	199	102.413	149.626	160.527	216.202
148.714	218.873	184.869	253.205	58.154	233.833	206	199
110.727	161.821	250.739	240.923	99	157.321	206	188.714
169.308	212.253	247.5	216.602	86.45	156.391	179.667	244.5
138.991	222.488	213	208.92	85.095	227	148.75	249
96.645	183.8	183.278	213	74.604	119.25	162.367	171.1
184	154.611	148.75	177.531	128.05	136.827	149.355	163.412
114.308	176.967	234.364	184.507	151.7	158.8	148.013	215.358
172.125	180.122	255	214.889	82.082	163	128	188.793
140.453	167.83	244.438	220	99	183.014	125.455	213.14
122.698	135.501	255	227	121.186	170.664	101.466	213.333
110.292	102.413	255	180.857	77.143	154.323	110.686	178.375
156.55	115.221	234.944	255	87.182	74.857	156	233.755
146.276	221.516	252.235	153.2	121.667	131.223	142	199
154.755	125.8	252	228.133	75.974	85	177.04	253.133
171.567	145.247	220	191.926	71.176	105.837	142	175.553
89.787	149.2	231.527	142	78.686	102.402	129.517	253.635
96.108	165.541	255	206.5	59.779	155.812	121.767	196.311
110.375	151.667	202.698	206	73.818	99	148	168.401
135.578	113.055	212.086	163	95.139	113	156.658	236.5
115.081	141.36	141.5	132	85.132	121.413	123.015	184
164	125.658	206.177	191.5	81.444	116.4	185	167.268
114.023	186.2	177.802	185.141	99	123	224.857	166.929
136.004	170.321	231.397	183.071	57.098	114	115.843	217.333
104.194	214.206	187.184	223.307	72.463	163.111	156	223.04
115.72	168.595	203.383	185	41.757	128.947	114.75	203.37
128.072	155	218.5	151	85	183.24	242	248.438
122	107.181	213	113.222	56	97.718	142	216.901
159.783	174.27	236.154	141	128	140.959	151.667	186.247
168.465	224.363	237.733	170	99	117.843	128	242
117.371	193.82	246.8	171	55.335	146.915	128	199
144.93	186.792	255	170	69.893	121.556	178.918	176.592
136.488	165.161	220.677	150.993	71.306	177	90.743	141.799
180.031	205	187.184	199	77.336	127	117.455	219.642
138	190.571	170	151.333	71	113	137.25	172.855
144.658	187.392	213	83.989	93.05	113.408	108.168	159.399
146.125	172.557	149.638	130.541	85.824	227	96.562	241
106.427	166.75	149.947	105.569	99	114.235	170	253.143
131.933	160.8	242	199	90.206	142.681	128	241
138	155.667	191.328	160.589	99	149	103.133	166.258
177.717	215	162.248	130.28	83.438	137.893	113	214.711
193.216	196.184	255	156	80.074	178.323	113	244.916
205.859	173.156	178.518	95.786	75.311	115.294	155.364	145.329
166.379	123.355	248.77	154.755	96.963	132.184	134.56	156.72
163.422	149.405	159.114	123.706	99	121.934	142	178.367
210.518	137.147	156	161.022	96.273	119.98	113	142.037
189.547	96.985	228.377	152.8	77.594	85	195.056	241
93.435	140.333	217.667	117.509	98.272	121.176	156	224.893
120.494	177.142	199	146.433	132.226	81.042	118.756	198.749
104.673	179	185	133.222	134.182	84.889	121.462	170
99.486	166.275	209.182	99	138.671	123.041	137.011	156
117.863	210.617	205.72	139.298	149.04	104	132.155	190
122	174.911	202.843	156	131.667	149.25	125.676	210.292
225	187.382	178.76	121.332	146.793	108.571	127.333	151.25
146.152	171.263	243.333	142	112.176	133.716	89.119	137.352
119.967	176.39	156	165.692	83.151	131.36	156	226.667
175	125.083	236.617	170	114	99.815	121.965	113
154	154.638	223	142	176	95.827	84.464	153.84
93.45	154.488	242.626	202	127	101.08	92.974	188.204
173	134.391	250.267	185	114	97.953	111.354	108.909
138.599	108.158	244.5	128	106.724	186.1	106.294	154.447
151.82	121.171	140.491	156	89.19	149.69	149.184	140.053
175.333	132.463	179.062	168	156	136.909	113	178.4
151.832	117.307	122.629	130.951	103.118	97.782	109.76	147.528
120.939	130.39	134.857	143.796	82.667	85	112.543	188.299
156.5	109	183.188	101.893	92	85.099	127	129.368
136.011	165.989	197.833	152.367	185	112.8	170	141.215
140.249	179	184.5	168.629	89.626	142	129.578	124.265
138	177.25	227	150.305	103.053	120	135.645	223
98.5	195.335	225.086	231.062	108.749	86.625	113.667	147.995
169.644	189.828	255	198	106.353	92.721	80.467	255
117.05	174.882	174.25	170	102.5	95.5	107.308	220.211
147.706	119.653	170	131.673	102.5	101.593	142	185.405
152.976	136.509	172.568	113.444	84.263	165.333	119.111	191.871
161.2	180.6	242.5	159.704	84	119.308	133.141	255
209.5	217.556	213	171.509	132.529	128.289	113	202.727
215.4	183.403	160.9	156.68	91.643	113	120.222	198.714
176.041	161.667	156	210.463	79.285	111.562	67.026	255
170.871	144.291	168.857	255	67.309	127	172.625	186.961
191	101.971	132.981	250.667	56	165.713	136.143	189.923
180.56	151.302	142.224	220.091	79	156	144.757	235.077
162.951	157.132	219.561	244.678	99.961	144.781	217.846	255
234.744	179	234	215.982	113	195.692	156	255
241.244	161.882	243.208	156	73.31	148.335	184	255
230.004	157.75	119.443	151.72	99	134.678	193.293	185
195.563	149.978	149	156	90.694	199	153.742	255
230	153.469	156	220	74.327	172.747	182.755	220
209.174	136.653	178.633	211.331	84.75	134.354	157.857	224.617
201.969	177.829	150.388	184	86.877	201.667	100.827	255
178.268	127	145.207	182.146	62.235	145.636	176.752	246.127
192.352	150.871	178.385	161.8	108.267	113	152.493	212.187
138.645	173.224	138.077	129.392	203.211	102.742	145.444	231.833
137.429	182.908	156	113	181.108	82.408	142.736	253.898
186.595	150.512	210.037	143.099	160.574	84.187	190.246	254.18
183.568	166.619	255	99	183.965	127	134.25	207.28
148.13	122.102	206.257	129.353	186.333	108.667	150.8	218.403
129.875	148.7	170	83.727	187.81	190.259	127.6	252.375
150.268	138.481	241	111.938	174.667	109.802	119.401	253.73
107	127.383	197.859	148.6	178.579	176.424	142	255
198	170.151	199	122.68	137.544	171	216.2	216.841
174	127.341	240.8	123.615	243.474	150.125	198.667	189.667
160.12	191.287	145.492	84.694	156.8	104.673	244.579	194.755
110.262	158.695	215.791	217.333	148.283	156	103.19	141.6
140.581	119.144	214.556	203.959	154.499	174	125.628	144.279
116.283	91	216.199	234.481	172.929	154	141	127.2
135.665	125.618	157.647	198	112.067	149.734	199	162.078
181.212	167.709	184	175.5	114.151	124.178	255	235.214
124.242	126.468	227.402	177	168.571	107.618	101.6	142
169.667	150.353	255	148.557	102.356	122.667	113	142
208.025	131.247	123.059	170	138.648	121.02	107.32	156
128.09	161.594	203.337	164.803	136.631	83.508	189.4	170
117.321	127	233.53	166.735	99.691	133.902	133.644	148.684
168.8	107.402	164.46	171	167.242	143.16	112.667	189.64
172.714	105.7	174.491	165.767	90.504	105.857	103.889	155.6
133.59	120.438	255	241	109.692	168.467	184	179.692
182	143	153.534	163.285	104.653	125.05	163	161.111
166.129	165.707	184	255	156	140.429	157.645	143.714
158	163.743	143.167	169.803	156	180.722	142	168.547
203.02	161.183	207.023	177	176.203	148.904	120.801	147.796
133	173.97	205.563	213	140.742	220.25	118.158	250.091
183.414	192.215	126	170.297	199	172.656	84.667	165.935
136.857	136.989	105.267	172.8	194	149.108	180.377	148.748
226.353	177.335	122.531	165.794	233.43	142	114	170
192.32	178.278	213	216.985	118.32	255	111.47	153.6
143	192.375	182.291	162.926	185	185	89.95	130.464
182.76	127.451	96.366	226.389	127	161.689	156	128
133.975	87.947	124.568	185	237.179	187.373	75.961	168.633
193.419	126.25	99.88	231.999	244.778	142.029	119.979	207.572
183.364	151.128	99	199	115.578	132.896	165.667	187.811
229	135.053	120.007	186.107	117.758	170.213	114	220.606
173.719	141.026	124.257	249.331	114.727	175.377	80	184
232.471	107.685	146.8	251.64	172.8	151.025	154.029	207.11
107.4	176.375	140.315	255	128	201.077	170	185
134.755	197	109.394	224.24	114.915	170	173.429	188
139.827	160.872	148.412	220	114	136.746	166.982	254.764
164.025	193.222	101.32	202.2	103.96	173.123	128.555	213.396
156.32	171.187	109	237.36	133.16	114	114.815	255
126.87	207.25	100.197	199	128.884	83.45	172.733	193.535
154	161.289	93.818	157.266	91.491	120.555	181.182	213.149
211.45	219.92	91.16	228.917	132.162	125.576	125.231	203.403
155.194	187.033	102.702	185	94.65	121.472	184	241
105.176	132.283	119	193.141	90.387	128.099	164.469	249.989
98.998	180.944	142	255	96	128	169.614	210.416
139.219	164.815	214.909	179.667	166.5	119.771	189.6	209.855
137.26	222.13	132.947	234	164.26	86.204	191	202.975
142.293	222	143.383	225.194	113	133.449	171.066	251.5
200.562	204	136.173	239.514	100.16	144.852	133.408	244.64
147.177	202.751	156	221.75	124.231	151.895	175.728	249.06
147.366	219.73	156.864	206.555	91.565	136.777	166.263	255
104.667	205.2	131.926	181.04	123.543	134.44	105.016	255
105.42	206.737	150.199	185.294	113.5	143.678	185.298	255
194.839	169.143	119.8	241.679	148.513	85	149.625	255
159.101	149.514	144.039	206.185	228	167.6	159.857	243.201
112.701	190.08	140.506	255	134.727	118.5	96.364	222.333
106.726	186.934	140.739	186.125	164.083	106.84	120	248.102
113.839	234.376	99	250.45	136.931	92.347	235.426	204.793
84.091	179	131.384	255	83	137.769	113	245.556
102.661	121.867	174.044	185.386	99.629	255	200.431	212.625
165.764	125.667	115.686	211.176	96.924	173.266	173.94	232.82
117.333	118.886	146.675	255	109.342	233.001	100.556	251.14
124.65	138.28	127	164.769	93.88	191.25	138.75	203.023
130.686	143.385	184	242	99	235.92	113	226.099
139.909	124.639	110	230.705	126.57	156	88.086	228.834
94.212	125	123.69	230.245	124.125	166.056	125.481	219.51
126.762	151.735	85	230.851	118.105	154.105	99	127.061
114.538	159.377	170	217.251	83.363	184	147.876	213
154.222	162	142	222.864	85.867	124.846	136.08	155.667
143.63	137.026	82.2	219.607	97.714	120.92	157.714	205
147.637	127	98.386	170.286	127	175.927	109.638	185.036
158.741	156.163	99	183.407	95.496	156.897	98.5	255
122	137.843	46.667	193.84	95.496	127.834	162.728	249.286
100.776	127.636	71	171	94.455	184.2	154.526	238.078
108	151.796	50.359	198.716	99	144.635	156	211.926
94.215	134.75	48.931	171	78.997	223.75	164.249	255
103.143	176.5	57.574	139.044	83.788	116.191	152.619	255
116.5	167.341	76.943	183.429	128	142	136.96	199.403
134.156	144.641	114	243.537	198	142	163.019	226.012
125.127	127.986	85.161	220.044	90.298	255	150.787	207.141
103.917	150.5	91.218	200.417	68.4	148.478	117.667	169.364
142.102	188	80.415	195.16	107.277	113	110.714	192.2
171.625	102.725	70.167	197.157	91.558	159.65	106.683	147.513
137	137.356	93.568	218.238	117.515	108.733	111.997	235.357
111.172	166	99.233	229	85	155.778	103.322	164.704
86.63	171.742	108.494	206.99	88.459	165.625	122.683	155.667
127.664	162	86.628	181.229	121.571	145.354	113	139.614
127.969	114.521	134.684	246.076	109.349	213	171	196.2
138	140.338	70	203.789	96.526	156	128	159.444
160.837	143.327	113	224.156	56.568	95.875	193.143	184.667
98.554	146.406	98.482	204.914	99.607	128.717	232.857	254.4
143.062	186.2	98.36	168.5	164.016	85	178	177.565
140.111	110.495	76.085	207.296	227	136.391	146.816	188.586
131.71	134.826	53.455	220	199.069	95.6	104.787	182.227
176.618	184.889	62.879	255	184.389	117.636	117.109	195.812
115.825	119.843	142	255	127.847	122.248	93.054	255
198.416	118	149.929	247.734	146.389	113.7	113	198.834
165.367	106.826	123.637	255	252	99	107.909	171.545
107.111	161	161.504	185.8	167.998	115.592	123.044	168.558
177.622	153.5	154.702	193.063	196.727	85.287	95	193.5
190.333	170	163	165.644	197.048	109.45	175.967	219.593
163.864	185.433	109.857	244.252	211.702	87.751	107.517	195.688
116.322	118.565	119.229	255	255	133.077	155.067	255
145.826	118.667	163	174.106	172.179	98.08	113.349	226.617
109.792	108.559	145.2	214	219.778	130.368	126.107	229.362
131.745	167.285	124.429	149	223	103	126.018	172.507
191.973	97.712	142.806	183.305	171.736	140.854	109.074	255
107.524	157.913	146	153.455	142	174.871	116.637	209.543
83.149	105.504	130.35	202	226.448	120.934	171	226.301
152.5	148.374	128	235.766	255	146.914	75.429	156.992
114.6	123.737	128.088	176.6	199	122.667	87.167	204.41
142.548	169.302	213.375	170	198	142	63.325	232.454
162.292	133.367	132.113	223.264	156	142	97.333	189.305
141.692	187.642	185	228	214.069	141.692	56.286	179.617
119.586	177.667	111.263	222.125	216.331	121.161	87.6	252.367
101	183.625	150.125	255	156	116.857	127	166.453
154.538	192.167	108.643	227	171	98.556	60	224.8
172.828	116.5	194.394	126.252	222.28	125.857	105.562	167.478
154.205	131.2	177	177.995	215.4	97.429	128.261	243
208.674	181.144	96.926	164.07	154.91	101.454	82.036	228
117.708	120.969	110.053	167	148.245	113.857	81.368	221.708
180	197.833	148.28	165.48	123.32	135.143	127.5	152.354
133.092	167.302	118.5	222.371	148.934	86.262	139.471	127.97
199.591	188.562	142	179.446	171	85.835	142	182.429
180.882	187.605	180.34	139.114	141	109.75	113	170.832
128.224	174.517	106.037	177.5	221.544	124	85.429	161.769
204.333	193	184	165.173	167.714	131.476	99	194.669
161.449	184	94.264	147.276	149.198	85	84.491	178
177.185	144.278	121.178	164.51	159.72	142	89.215	199
175.229	149.588	178.333	105.75	125.592	97.727	117.667	158.467
177.45	133.444	139.51	142.179	251.769	112.849	136.333	220
197.876	173.468	170.82	197.867	180.686	138.056	102	156.357
217.866	171.184	156.037	113.96	246.929	107.631	142	177.598
185.41	193.027	141	118.688	187.889	76.143	98.56	224.515
194.349	171.909	170	158.675	136.29	129.897	86.511	213.615
194.88	158.703	168.485	155.077	141	82.375	77.927	194.834
197	185.956	146.947	106.231	188.58	105.259	106.277	223.5
126.59	189.714	210.96	242	228	143.686	178.789	255
134.111	160.95	202.231	231.778	142	106.476	94.25	227
122.889	171.339	170.934	180.384	137.306	182.553	88.44	247.457
185.796	184.367	238.857	211.057	179.613	128.346	127	229.032
145.825	184.459	183.267	253.265	135.004	145.152	69.04	236.253
174.535	180.478	127.56	170.966	170	76.891	84	254.976
134.001	178.505	134.69	200.864	90.246	146.775	162.986	240.825
115.935	137.889	127.286	180.182	190.25	151.714	115.73	234
143.295	172.28	156	212.667	131.045	134.618	125.857	235.667
144.235	224	139.593	122.523	135.159	126	113.2	184.111
179.393	148.15	213	185	113.949	139.75	96.2	201.05
153.895	110.308	156	166.246	127	105.111	93.906	217.839
201.143	157.888	146.225	164.254	127	100.647	127	210.611
201.074	167.796	168.786	121.167	131.407	130	133.502	184.444
163.18	190.074	146.238	136.411	177	142.133	124	255
219.556	186.5	156	116.083	137.667	97.122	108.867	255
197.399	181.29	133.148	165.604	133.481	149	90.065	227
213.971	198.125	142.615	143.393	120	128	106.5	227.182
201.14	202	180.632	241	163.355	184.926	71.952	215.822
207.259	164.333	142.448	125.086	156	113	67.469	255
154.095	110.174	141	133.429	146.308	78.667	59.053	172.963
178	154.858	189.153	141	116.486	135.953	119.263	164.8
115.154	123.467	188.636	176.345	162.846	87.093	156	220.111
155.6	154.835	163.642	136.898	150.88	133.789	118.166	217.115
117	123.645	168.674	132.333	159.42	175.714	111.419	214.8
139.25	125.517	102.364	120.949	197.166	129.867	106	236.352
137.583	139.168	128	107.86	94.333	141.062	149.368	231.455
189.84	162.959	133.167	105.994	162.778	140.235	85.872	165.333
250.6	138.273	197.846	106.671	129.02	110.81	113	156
162.802	113.5	164.581	150.073	156	93.267	99.174	154.148
214.82	176.158	220	164.4	94.776	170	140.231	214.172
143	96.312	111.958	125.844	139.571	150.747	139.769	155.1
138	131.223	155.714	108.794	94.645	164.4	171	249.615
133.997	155.57	170.5	127.75	116.383	184	142	235.805
118.237	111.888	120.245	108.618	97.923	199	103.812	255
120.507	166.91	147.6	128	134	223.529	141.857	232.258
126.583	116.348	165.515	107.848	88.892	149.512	153.204	255
226.152	129.082	156	116.684	101.545	82.131	60.5	242
184.537	137	132.098	123	121.867	85	99	192.041
168.234	143.223	143.5	133.012	98.913	90.889	98.408	142.893
178.425	113.698	99.776	138.822	80.24	98.537	60.497	191.795
151.356	89.444	150.5	181.059	107.527	125.611	80.142	245.455
141.38	169.069	141	166.053	104.482	73.111	85	228
168.568	212.6	119.682	221.333	101.909	171	99	255
242.877	142.968	143	200.143	113	113	90.36	159.065
205.444	174.408	151.453	178.785	84.444	96.737	61.028	199
160.897	158.429	131.254	152.337	171	102	60.889	136.103
183.641	134.86	133.44	191.875	155.457	91.312	96.901	199
232.587	125.957	129.786	184.667	144	113	142	169.653
179.085	146.684	139.383	106.668	179.167	165	99.333	109.935
180.46	146.104	178.963	128.073	153.5	113	70	199
167.73	180.333	126.492	214.85	115	90.842	85	156
199.9	146	184.667	167	177.4	114.544	86.727	180.267
196.046	165.102	152.25	139.061	159.867	110.182	65.772	242
135.649	159.17	158.747	158.24	110.139	88.077	72.112	228
138	151.51	137.28	144.142	171.186	93.084	70.607	185
110.742	159.608	149.457	213	156	66.593	73.646	191.777
185.72	145.953	171	143.36	172.1	148.432	88.266	250.896
175.92	184	160.267	194.547	199	100.032	57.422	187.167
123.105	141.485	193.818	108.769	155.698	84.174	113	183.945
	157.028	156	128	183.556	137.627	99	213
	163.306	169.876	213	153.645	156	70.422	212
	148.725	156	127	113	99	86.225	207.92
	175	160.62	141	156	128.673	77.484	205.922
	180.873	229.466	170	161.106	121.028	93.52	213.629
	228.674	198.109	118.52	163.5	219.077	107.618	203.941
	219.889	171.688	116.923	86.102	142	66.667	198.8
	199.691	178.266	185	94.938	122.7	128	220
		178.286	126.83	113	142	104.061	255
		168.74	156	100.686	128	73.778	255
		170	156	139.222	107.304	113	228.867
		202.238	156.262	110.618	111.429	94.538	255
		157.84	104.091	185.58	112.222	42	244.548
		137	102.198	133.41	89.178	129.298	241.393
		125.364	170	170.815	133.2	69.084	172.579
		113	127	89.975	114	98.724	255
		100.64	163.746	132.478	149	111.222	163
		142	118.747	170.455	113	95.182	122.667
		156	141.039	89.786	85	108.2	151.415
		150.156	102.857	113	108.632	125.875	170
		151.926	191.778	97.526	73.696	99	255
		134.932	152	142	93.181	127	163.274
		146.229	202.518	168.882	79.889	99	163
		75.017	198.408	133.857	88.617	59.996	255
		104.643	170.545	121.994	149.457	128	209.635
		157.625	115.432	86.667	115.982	141	189.444
		132.693	127.5	96.486	99	71	128.2
		110.846	130.898	131.86	156	91.044	126.541
		127	113	96.333	118.763	75.625	173.111
		130.72	116.444	168.875	85	115.174	212.965
		101.308	137.977	84.864	128	87.063	255
		126.333	104.977	85	177.037	141.667	206.852
		130.694	195.178	70.6	149.545	95.2	228
		191.583	242	141	144.22	80.222	211.789
		158.5	201.971	99	198	119.714	156
		150.785	197.684	67.851	94.938	113.065	108.333
		107	245.4	85.605	119.404	76.618	158.347
		168.547	254.634	113	184.333	97.619	127
		147.642	247.8	113.952	142	99	181.273
		195.62	138.316	121.506	101.25	86.333	255
		182.005	143.371	86.867	118.478	142	198.2
		159.857	158.669	110.154	132.826	85	154.595
		123.371	168	105.7	238.05	121.619	198.609
		137.519	106.697	149	201.811	99	212.613
		156	179.728	113	85.348	133	160.615
		142	139.124	191.75	106.857	83.562	198
		132.327	213	136.769	131.355	79.756	187.6
		111.976	142	221.857	154.556	128	151.615
		121.27	175.9	170	204.984	82.72	178.32
		148.182	156.333	141.825	142	65.12	198.149
		98.207	175.152	113	212.786	76.125	156.391
		156	157.16	131.882	148.488	84.171	199
		171	130.539	109.246	228	162	198.606
		100.825	141.531	93.642	157.549	84.333	128
		108.074	199	89.81	113	70	217.81
		112.301	167.638	117.204	179.385	56	190.388
		113	199.327	144.857	159.374	95.091	172.311
		119.111	203.333	102.44	234	87.945	129.225
		97.7	131.526	100.694	255	70	176.654
		91.833	213	78.632	253.492	74	223.696
		92	181.938	103.647	108.125	88.711	145.636
		84	187.857	141	100.78	156	218.94
		67.455	183	141.665	147.364	107.933	199.802
		88.24	228.63	199.727	129.837	113.5	175.374
		69.885	93.815	172.938	99.145	82.617	199.566
		174.13	128	191.333	103.893	97.667	132.333
		114.778	85	181.778	116.926	77.732	213
		98.688	102.2	169.264	156	110.88	172.395
		122.573	123.32	210.491	85	91.75	196.714
		134.558	144.944	234	128	81.125	156.694
		104.5	118.545	193.996	107.769	99	191.067
		106.857	113	244.682	116.872	51.333	157.388
		165.511	111.075	198.459	111.444	103.953	231.5
		128	127	168.43	203.265	85	156
		99.336	127	237.284	232.25	97.68	135.128
		70	180.75	194.92	205	82.309	109.749
		111.145	139.401	225.88	120.228	135.95	146.011
		127.333	169.149	211.202	148.594	127	140.824
		117.308	138.778	135.556	114	184	191
		116	155.833	200.947	144.612	108.655	242
		109	168.16	223.111	121.781	95.833	174.742
		168.84	168.926	191.359	199	84.5	199
		121.903	139.44	206.025	106.272	52.889	217.604
		129.125	184.608	206	150.723	134.636	174.364
		125.719	208.963	170.751	156	171	233.787
		186.9	181.929	167.44	191.833	99	191
		88.529	142	142	135.107	68.617	145.997
		128	129.643	138.509	137.574	97.763	139.64
		106.509	178.868	179.013	156	74.455	184
		137.383	241	117.143	255	99.51	172.32
		95.728	141.889	141.636	154.288	43.75	229.587
		99	194.521	142	141.887	66.875	210.646
		101.545	172.231	127.333	141.071	78.498	213
		170	141	99	151	98.834	150.297
		185	114.163	112.452	116.75	113.312	217.562
		82.32	128	131.2	109.267	96.204	180.232
		42	127.346	136.477	140.975	40.097	235.885
		85.818	122.333	188.58	148.16	128	225.408
		87.711	116.733	157.178	222	172.727	255
		71	143.2	167.211	133.052	156	240.818
		107.297	156	156.135	147.481	142	220.76
		114	160.898	174.696	110.435	135.449	191.896
		99	139.1	156	106.596	114.12	247.829
		156	213	203.667	130.061	95.429	239.857
		156	189.2	146.17	137.111	85	178.52
		146.037	169.714	202.062	120.622	99	176.843
		179	153.305	128	118.538	110.857	237.417
		104.655	154.918	138.667	92.975	125.901	196.538
		99	171.222	135.226	197.345	77.818	217.703
		85.266	219.56	255	148.833	116.444	201.207
		103	199	191	118	156	202.2
		167.429	189.481	227.8	162.077	81.25	239.8
		123.156	135.556	249.789	127	142	170.824
		93.83	140.947	185	139.886	142	255
		122.355	117.286	149.277	121.875	131.49	203.667
		135.857	113.942	201.443	149.227	163.951	222.719
		114.414	128.711	170.714	153.2	144.098	213
		128	136.577	173.412	129.921	127	211.817
		116.633	99	222.575	122.128	68.992	152.263
		213	158.571	146.483	126.143	99	142
		174.653	141.484	156.812	156	129.449	134.414
		128.818	156	131.822	119.337	142	138.622
		128	134.136	112.457	113	60.275	207.27
		143.512	193.917	162.901	113.998	71	164.333
		101.92	160.24	203.956	99	156	223.966
		143.846	129.273	148.364	156	47.632	187.556
		133.707	215.808	138	133.4	112.851	160.827
		124.678	203.346	158.708	127	99.074	141.051
		79.414	213	121.03	108.08	103.741	171
		128	197.482	130.401	121.655	69.111	229.489
		127.469	204.809	107.316	220.027	40.617	213
		111.667	190.44	86.316	142	54.526	181.75
		135	170.315	97.353	184	77.913	176.165
		65.333	127.865	142	166.609	78.596	172.194
		126.526	148	104.609	135	56	147.373
		115.391	186.633	118.385	242	64.318	113.203
		169.796	215.381	131.671	156	55.526	160.5
		170	121.554	81.25	146.688	55.104	172.953
		146.13	156	144	183.42	99.017	227.383
		156	115.828	92.571	172.545	130.201	255
		155.68	158.418	82.694	221.588	115.958	173.314
		110.385	168.756	42	201.6	83.824	160.884
		133.889	186.1	148.485	196.037	71.96	179.538
		131.32	136.405	103.875	156	139.6	153.053
		121.248	165.167	156	141.611	111.26	141.169
		156	223.284	255	156	85	190.412
		128	151.067	215.286	156.521	86.381	162.529
		136.365	171.235	151.281	186.869	66.715	166.074
		170	129.676	204.215	204.253	74.368	133.71
		131.167	161.439	226.566	186.564	143.626	188.985
		119.222	207	231.964	174.667	92	215.571
		99	140.871	232.786	228	75.461	210.913
		99	170	198.5	136.923	114.538	210.102
		88.184	150.891	141.125	199	154.444	170
		67.714	156	102.922	198.833	89.314	169.501
		109.512	161.4	150.147	252.803	67.769	241.913
		164.538	234.25	128	123.931	133.86	230.472
		91	213	108.333	127.424	87.6	214.16
		126.751	255	163.368	149.421	72.033	219.205
		127.083	155.59	184	150	109.68	212.601
		86.4	181.8	81.124	108.69	148.158	192.309
		116.4	170	172.685	113	114.846	246.6
		75.463	171	166.028	99	115.644	212.395
		110.25	163.08	181.209	128	76.97	232.688
		99	170.713	177.047	127	87.332	242.872
		95.875	127	123.017	114.088	77.128	235.144
		174.217	225.25	99	156	81.306	253.604
		92	230.06	114	127	91.307	255
		142	141.984	104	102.961	109.345	89.971
		113	168	127.333	84	177.174	79.625
		102.463	136.3	96.08	143.446	114	82.602
		145.837	215.061	175.672	66.488	72.714	100.5
		98.6	183.286	117.889	106.625	144.533	79.888
		90.45	156.429	143.006	85	92.882	74.963
		111.878	128	127.337	72.533	113	56
		127	99.148	100.381	76.2	56.667	59.157
		114	153.372	136	107.909	133.579	61.091
		163.546	134.395	122.855	101.379	69.64	186.238
		206.25	120.544	120.886	91.033	56	159.2
		146.934	159.462	116.953	141.286	64.4	113.795
		213.667	162.639	146.545	99.333	59.069	167.8
		176.068	160.633	101.959	114	64.037	107.472
		172.35	114.031	94.44	144.154	85	160.333
		88.16	181.027	119.796	86.148	85	156
		142	207.173	94.453	101.6	44.831	154.353
		135.029	184.024	134.457	142	61.792	134.731
		186.374	185.381	70	99	67.053	188.812
		97.741	192.25	113.5	91.975	196.333	147.93
		109.959	209.512	148.106	117.143	163	117.43
		181.353	176.351	98.67	105.75	228.488	134.667
		93.278	215.125	97.471	110.624	167.453	136.633
		133	170.5	170	152.883	144	91.219
		142	206.333	82.578	151	247.364	142.12
		192.885	187.451	84.102	112.367	203.25	213
		183.84	164.4	124.269	135.194	199	172.917
		156	244.5	156	116.284	156	100.56
		188.338	105.385	82.824	89	206.355	101.512
		152.857	133.931	56	123.857	202.1	128
		185.86	147.56	63.692	213	176.73	124.778
		151.5	178.947	57.35	189.988	189.545	100.321
		141.25	141	69.677	94.222	212.455	196
		166.714	125.719	55.662	87.886	151.784	85
		115.441	227	84.694	76.786	204.422	130.667
		93.3	151.333	74.033	73.5	144.818	85.19
		116.077	255	57.453	184	152.692	234
		169.631	155.456	113	91.448	234.993	155.834
		128	179.55	90.145	163.889	187.96	123
		127	195.675	126.127	156	222.353
		153.2	211.6	95.891	103.637	207
		129.462	183.16	85.704	104.954	237.5
		156	156.726	75.827	129.68	202.335
		133.165	170	93.027	119.714	243
		117.667	209.306	56	84	213.909
		114	220.727	73.473	116.094	255
		89.14	245.276	80.6	142	241
		114	233.272	68.992	137.333	218.224
		131.677	203.964	108.933	115	200.789
		111.72	199	89.114	102.495	159.812
		159.704	241	99	84.833	172.32
		80.462	177	89.147	99	184
		156	244.333	113	115.246	184
		128	140.869	170	131.565	228.467
		121.974	139.051	140.333	107.75	228
		99	106.928	129.829	99.164	213
		156.889	170	128.685	117.511	142
		142	112.353	185.355	76.63	126.603
		206	147.694	147.167	129.367	155.091
		151.636	127.837	189.472	90.448	115.945
		168.444	109.196	145.25	215.269	227
		142	126.288	96.295	218.769	192.309
		153.793	84.557	104.854	160.521	168.143
		95.994	151.355	141.167	163.16	142
		125.73	142.846	156	167.667	162.143
		162.698	138.375	123.646	255	194.222
		95.355	149.889	163.274	152.469	133.214
		149.778	187.285	126	144.497	140.48
		102.648	113.186	163	176	155.556
		139.793	203.667	141	219	142
		91.56	181.956	156.522	230.959	153.435
		156.286	180.136	97.223	242.88	211.801
		95.32	220.798	103.688	197.734	200.88
		131.667	209.438	142	226.531	140.286
		109.889	230.5	141.186	215	213
		160	141.786	135.195	247	177.228
		107.045	127.754	124	144	193.6
		153.239	110.667	141.062	218.757	233.786
		134.99	133.736	98.5	248	188.409
		108.744	87.58	127.515	249	157.837
		123.5	143.775	126.974	247.778	208
		170.343	158.755	127.667	239.842	171
		118.972	112.513	81.652	230	197.787
		171	156	99.125	175.344	199
		200.091	140.837	73.317	202.4	142
		181.2	137.968	83.875	179.5	200.143
		118.889	77.493	108.127	155.545	204.692
		178.4	62.094	108.526	132.817	220.178
		125.864	171.476	54.25	178.277	236.333
		200.444	85	128.769	203.6	173
		139.96	85	80.84	105.865	228.667
		152.48	92.343	70	172.5	185
		131.356	117.897	92.987	234.796	183.439
		144.445	108.153	48	178.75	242
		105.128		59.167	154.92	220.333
		159.714		67.5	162	202.358
		128		85	168	242
		184		70	204.964	227.46
		103.202		100.857	199.933	246.795
		144.273		170	138.2	168.557
		108.077		86.96	172.396	185
		137.571		105.125	130.5	195.6
		106.148		106.512	151.556	205.978
		115.286		100.71	152.375	213
		82.531		133.617	101.5	185.08
		199		173.667	139.789	255
		127		102.312	236.497	255
		170.778		141.2	122.918	254.942
		143.545		108.653	137.25	197.96
		121.167		141.6	106.367	170
		120.625		115.667	106.906	198
		113.287		150.533	114.595	123.039
		128		80.622	114	107.55
		158.567		142.963	95.84	110.596
		109.411		140.339	124.006	140.455
		142.49		57.037	120.2	88.029
		185		61.6	178.471	129.93
		128		77.465	156	136.875
		123.889		127	117.667	125.469
		177		81.5	140.939	165.432
		111.429		124.309	159.355	140.367
		176.956		113	129.222	139.446
		104.367		89.877	156	192
		119.538		130.767	146.471	108.353
		125.2		96.509	163.497	102.908
		142		133.899	110.405	142.076
		127		118.25	118.636	119.111
		91.222		84.996	93.709	86.85
		169.714		100.561	99	136.359
		141.6		127	109.245	164.096
		137.52		117.565	101.306	121.736
		115.504		104.323	111.999	142
		97.154		91.006	107.671	93.403
		120.382		76.675	142	170.556
		138.167		119.905	109.75	211
		114.627		102.143	126.389	141.667
		114.909		85	149.545	149.381
		100.099		47.361	154.448	130.612
		101.562		64.211	124.574	158.053
		109.62		72.752	99	191
		86.474		106	113	120.579
		142		118.842	123.373	88.837
		119.754		60.12	127	223.981
		199		120.316	147.365	211.181
		142		107.315	91.5	125.136
		127		115.8	142	208.267
		113.429		181.8	142.302	120.895
		143.25		102.48	103.28	129.416
		178.802		99.546	117.042	102.111
		82.322		60.224	100.919	107.176
		167.691		102.467	99	113.075
		135.706		74.125	203.909	170
		82.012		80.144	69.84	108.213
		206		71	110.136	131.8
		192.56		95.306	123.167	129.561
		156		156	127.6	113.69
		103.499		98.488	135.296	130.42
		131.75		98.011	113	114.997
		127		56	165.877	123.05
		75.796		76.857	194.857	151.373
		165.615		69.176	180.777	220.053
		140.933		99	153.312	163.5
		107.188		52.957	82.765	136.959
		73.333		68.085	142	166.267
		79.041		53.018	119.432	113.8
		120.673		73.738	113	153.343
		91.333		57.037	102.331	161.922
		85.146		110.909	100.008	180.282
		141.575		80.442	86.559	129.938
		99		52.16	134.111	131.062
		84.833		56	97.309	150.909
		142		63	108.099	128
		157.353		75.347	119.086	145.544
		113		84	123.421	144
		99		132.802	166.531	154.8
		135.704		56	138.488	191
		117.923		99	174	198
		124.431		99	154.909	152.118
		185		58.082	123.5	181.988
		213		99	173.659	174.251
		129.006		71.024	98.006	153.716
		89.332		56.567	136.372	152.736
		132.401		94.111	103.375	156
		68.135		78.138	104.822	113.148
		68		99.925	145.333	182.73
		94.333		96.796	177.224	139.071
		82.688		68.512	212.891	139.25
		97.6		114	242	149.494
		112.8		70	241	130.629
		81.611		93.977	132.184	124.982
		99.421		99.337	159.857	56
		128		109	179.667	41.388
		86.237		84	194.368	71
		103.63		95.447	191.52	62
		84.769		135.387	197.018	68.655
		111.108		116.118	216.664	67.665
		81.867		123.2	138.444	60.25
		108.016		113	213	70
		99		113	222.429	89.188
		85		87.333	184	89.25
		99		56	121.604	88.536
		99		65.633	99	50.786
		120.89		86.471	89.663	129.579
		178.396		78.157	73.704	85
		142		124.175	92.95	99.333
		154.333		110.742	87.595	82.324
		129.6		109.56	141.571	49.594
		137.419		92	118.765	85
		132.84		70.653	106.132	66.639
		160.767		70	118.578	62.054
		113.351		75.243	136.333	70.667
		143.333		80.134	198	75.247
		143.188		107.622	191.182	70
		189.667		101.592	155.864	84
		163.778		139.684	107.815	69.183
		152.089		122.069	163.635	131.107
		118.6		127	183.292	128.603
		127.186		75.077	177.027	94.752
		145.701		113	160.667	121.8
		148.846		142.314		106.457
		157.333		69.951		199
		113		96.808		77.047
		145.4		81.091		97.713
		130.556		89		103.498
		150.02		86.12		101.722
		109.321		54.995		98.126
		209.315		93.185		122
		93.398		129.718		135.126
		148.517		90.857		152
		86.647		113		168
		142		70.495		84.2
		145.88		74.869		101.311
		121.816		99		106.485
		109.485		99		95.531
		76.625		125.759		63.57
		137.219		129.632		71
		99		87.6		109.344
		173.422		95		96.805
		154.281		84.75		93.667
		114		128		85
		119.872		112.104		156
		153.486		120.582		91.535
		161.167		158.954		192.644
		177.591		128		112.332
		178		113		147.857
		125.747		117.162		103.333
		192		154.214		131.012
		189		123.18		215.118
		150		113.758		224.508
		167.725		122.053		218.74
		109.25		127		142.062
		132.471		129.974		139.174
		197.2		104.545		127.9
		234		145.857		126.278
		156		105.798		142.405
		97.78		142		97.333
		99		143.444		130.921
		129.333		125.645		105.039
		132.909		184.907		161.993
		108.667		164.069		158.737
		94.783		104.602		85.167
		95.222		184		131.316
		128		167.333		89.421
		130.857		163		114
		89.328		138.276		128.364
		82.846		128		84
		69.113		85.547		125.481
		98.538		70		162.333
		117.143		65.601		155.5
		109.669		56		153.331
		73.802		77.4		132.735
		113		87.225		128
		109.125		129.301		124.505
		136.078		67.949		111.654
		99.398		46.884		173.238
		89.482		70.571		174.869
		110.329		60.4		218.045
		105.891		99.949		244.392
		109.905		57		219.371
		97.786		114		192.782
		136.909		82.074		194.84
		156		96.818		138.802
		93.941		104.214		221
		77.933		248		245.583
		147.824		110.173		210.319
		121.188		89.295		162.43
		185		123.959		226.031
		133.923		56		222.45
		131.844		64.882		202.85
				170		214
				128		197.6
				105.782		141.174
				156		177.42
				81.191		129.891
				87.086		141.932
				77.06		156
				95.889		148.812
				128		179
				68.388		153.336
				99		160.17
				137.349		143.068
				127		171
				107.523		156
				82.15		175.714
				84.873		220
				94.647		235.636
				56		211.571
				82.931		244.154
				102.333		177.123
				98.238		229.714
				159.118		188.083
				98.307		211.733
				86.31		175
				78.977		251.49
				118.276		222.074
				197.547		229.397
				242		190.37
				231.075		254.619
				138.668		255
				170		226.678
				228		184.018
				204.333		171.462
				154.846		235
				139.469		243.301
				176.84		190.822
				156		230.737
				206.5		162.284
				154.493		156
				145.714		117.868
				204.56		170.571
				127.109		203.261
				75.539		134.717
						195.489
						255
						242.444
						193.289
						223.706
						176.172
						157.636
						118.942
						198
						114.422
						116.545
						142
						181.443
						106.701
						170
151.128	158.412	144.641	170.742	123.367	139.588	134.945	192.478	Average
35.9761	31.118	44.1284	41.7592	44.5889	40.8267	48.0489	42.515	Std deviation
