# Supplementary material for: The Arabidopsis V-ATPase is localized to the TGN/EE via a seed plant-specific motif
Source: eLife. 2020 Nov 25;9:e60568. doi: 10.7554/eLife.60568 (PMC7717909; doi:10.7554/eLife.60568)
Supplement: Figure 5—source data 1. [file elife-60568-fig5-data1.xlsx]

## Sheet: Graph
	L159T		L159T+ E161S		EEI deletion
	Col-0	vha-a2 vha-a3	Col-0	vha-a2 vha-a3	Col-0	vha-a2 vha-a3
1	1.4932	2.53197	1.8906	1.74022	1.49448	1.4853
2	1.68242	1.84753	1.5865	1.92638	1.36143	1.78997
3	1.90289	2.16761	1.31648	1.72529	1.18536	2.02988
4	1.7191	2.22188	1.90665	1.74978	1.52841	1.67348
5	1.92235	1.80102	1.85545	1.89928	1.28088	1.70704
6	1.75882	2.6213	1.53228	1.9024	1.41863	1.92026
7	2.00344	1.86132	1.59327	2.15805	1.42133	1.52908
8	1.68819	1.88018	1.56339	1.96731	1.23249	1.39752
9	1.9032	1.78874	1.62251	1.96071	1.78749	1.84793
10	1.453	2.15188	1.60365	2.20025	1.33722	1.76552
11	1.70087	1.85357	1.37231	2.21909	1.44335	1.81477
12	1.70907	1.71271	1.873	1.68831	1.51606	1.83944
13	1.71237					1.49435
Average	1.74222	2.03664	1.64301	1.92809	1.41726	1.71496
std dev	0.160488	0.301259	0.198853	0.186215	0.160082	0.189552

## Sheet: Raw data
		18 col						18 a2a3					L159T col-0						L159T a2a3						L159T + E161S col-0						L159T + E161S a2a3
		TGN	Vacuole	Ratio				TGN	Vacuole	Ratio			TGN	Vacuole	Ratio				TGN	Vacuole	Ratio				TGN	Vacuole	Ratio				TGN	Vacuole	Ratio
	1	83	65.067	1.49448				204.789	75.642	1.4853			171.198	131.122	1.4932				183.381	57.111	2.53197				165	88	1.8906				207.111	77	1.74022
	2	107.223	74					218.204	141				139.242	79.542					165.102	78.72					135.688	64.75					171.673	105
	3	178.429	82.2					204	116.639				203.5	94.667					186.265	80.053					143.4	36.286					162.185	87.667
	4	91.889	69.042					139.744	76.667				138.007	134.133					198.222	66					96.412	30					197	68.888
	5	105.499	57					164.454	86.148				204.037	99.847					136.289	88.074					98	40					104.615	92.031
	6	132.963	87.333					160.995	82.242				156.126	133.359					154.654	54.891					104	77					110.787	83.327
	7	146.476	109.364					149.347	78.809				228.75	100					137.667	93.401					95.407	59.675					148.09	91.68
	8	132.174	91.333					163.556	77.216				195.982	138.359					152.667	44.794					90.692	61.438					219	112.111
	9	105.426	99.074					179.692	106.404				154.144	133.044					145.284	68.028					99	51.08					137.333	133.172
	10	134.461	82.198					118.327	157.397				148.333	92.111					219.556	63.834					90.426	120.252					156.333	99.796
	11	116.061	82.533					110.708	148.333				148.222						219.217	82.642					74.041	50.111					71.75	152.041
	12	164.667	85.728					147.818	101.44				169.139						202.667	76.889					108.133	71.332					172	72.169
	13	149.273	95.5					141.375	98.667				182.596						162.382	80.222					95.901	52.429					152	72.333
	14	159.911	78.657					89.609	77.051				222.286						162.884	62					62.375	62.469					182.905	88.556
	15	188.933	99.286					131.892	78.97				232.667						220.667	46.289					100.73	49.857					172	132.391
	16	99.76	123.453					113.556	54.238				222.416						128.795	69.24					115	67					148.651	91.25
	17	131.833	82.733					118.49	64.778				133.827						124	67.596					103.822	42.377					255	61.357
	18		114					127.166	67.034				153.778						212.667	45.72					151.333	33.297					196.477	77.778
	Average	131.058	87.6945					167.446	104.889				189.453						138.901	32.704					57.2	34.112					187.55
								127.667	76.002				129.556						175.222	54.88					154.375	51.125					218
	1	88.742	123.192	1.36143				156.84					103.515						157.757	74.234					131.258						63.456
	2	112.037	123.62					130.187					152.426						209.846	62.057					104						215.252
	3	93.716	76.333					112.556					159.093						107.188	71.333				average	108.009	57.1295					160
	4	101.956	68.391					74.709					99.568						168.055	65.407											222.51
	5	116.272	122.266					183.143					119.294						203.074	76.156					79.242	61.485	1.5865				201.75
	6	99.542	113.753					93.901					179.583						157.536	81.306					103	157					180.01
	7	173	97.631					88.946					166.333						106.707	86.555					167	56.909					124.333
	8	185.205	101.444					103.444					247.253						133.639	67.022					196.444	68.625					167.5
	9	101.2	89.148					150.583				Average	169.654	113.618					103	73.432					93.83	63.338					120.719
	10	125.653	113.585					147.333											149	45					91.678	54.444					183.708
	11	124.926	77.506					116.111					192	50.332	1.68242				161.972	47.224					96.969	66.08					155.5
	12	124.346	90.547					106.389					192.267	72.867					162.37	44.42					108.5	71					152
	13	160.612	89				Avergae	138.843	93.4783				181.241	68.225					138.38	45.795					118.214	103					231
	14	115.815											153.5	81					133.83	43					91.093	68.909					156.857
	15	110						219	127.851	1.78997			217.48	68.762					135.222	53.778					122.156	58.971					161.778
	16	127.84						159.932	158.426				243.714	93					116.644						133	64.929					99.279
	17	232.467						129.238	154.68				155.824	92					127.802						159.694	83.132					191
	18	88.951						139.828	88.095				175.116	124					72.605						128.479	57.25					174.878
	19	109.167						218.737	90.093				184.521	96					184.047						183	66.406					156
	20	163.444						204.444	140.085				155.153	105.401					199.444						78.565	138.522					152
	21	130.772						159.037	87.707				152.882	97.5					153						154.897	108.462					92.765
	22	142						224.84	96.806				242.84	136.605					167.945						122.37	82.5				average	164.214	94.3637
	23	108.333						235.222	126.481				151.519	117.204					169.707						204.42	77.667
	24	199.225						244.17	123.721				245.929	151					143.254						130.463	117.622					129.4	102.6	1.92638
	25	154.609						208.762	87.707				230.374	136.889					116.25						94.25	91.679					144	90.059
	26	149.974						138.932	111.605				188	163.637					172.42						153.882	74.355					168	93
	27	171.178						178.667	127.104				153.982	172.5					149.544						135	97					77.294	106.308
	28	149.361						216.444	118.356				162.573	112.03					193.333						126.077	70.6					94.704	104.571
	29	148						216.109	92.667				186.1	109.8					246.148						109.667	105.147					122.231	65.986
	30	78.875						233.5	86.578				191.009	98.551					203.578						134.667	157.44					128.278	66
	31	136.242						164.444	76.143				113.667	104.626					197.333						98.125	65.857					129.037	78
	32	125.358						176.932	91.837				152						174.934						194.859						126	76.667
	33	126.222						170.389	93.667				162.785						209.333						137.008						102.273	71.867
	34	113.969						149.049					145.457						156.63						110.439						123.243	69.272
	35	149.333						168.427				average	180.414	107.235					172.265						145.129						89.028	68.42
	36	151.667						212.944											182.858						99.811						146.188	103.625
	37	183.833						167.366					172	108	1.90289				205.556						103						131.601	81.167
	38	102.667						149.944					151.763	102					155.333						69.778						176.455	82.281
	39	119.676						194.78					166.333	97					165.234						211.865						143.12	80.2
	40	138.178						156.835					175.322	101.844					153.636						150.077						215	78
	41	175.227						193.156					208.28	85.765					107.667						170.586						255	75.5
	42	161.76						211.667					240.124	113.579					195.755						143.796						118.213	79.286
	43	148						182.047					176.062	76.32					136.913						168.583						240.875
	44	137.57						121					180.5	110.56					88.887						221.222						254
	45	188.259						142.983					255	91					207						111.556						243
	46	118.822						195.2					194.302	94.631				Average	162.756	64.2802					178.385						190.4
	47	123.519						148.389					175.353	97.419											151.03						221.667
	48	153.542						163.806					156.833	126.64					103.455	60.163	1.84753			average	134.461	84.7529					255
	49	150.133						197.578					154.987	85.066					153.5	66.571											196.195
	50	89.642						114.6					167	108					133	54.711											255
	51	94.571						182.444					203.905	90.778					90	59.333					118.188	86.634	1.31648				136
	52	107.898						139.564					167	90.778					145.639	67.579					90.744	93.5					223
	53	156.852						135.667					245.753	121.965					113.331	62.5					133.125	59.08					188.5
	Avergae	134.72	98.9551					183.333					209.6	116.23					139.165	80.612					105.471	123					214.667
							Average	178.735	99.8537				127.286	71.714					101.938	67.186					132.75	153					198.48
	1	116	119.857	1.18536									121.438	80.338					129	50.257					133.889	135.857					195
	2	235.933	113.131					154.198	143.265	2.02988			213	77.556					192.889	54.5					189	110.836					97.374
	3	139.368	152.25					150.12	83.722				135.985						136.506	79.837					138	100.75					121.556
	4	135.25	173.875					195.901	117.773				179.545						171.124	74					146	132.219					169.174
	5	115.551	121					212.832	106.476				234.556						124	82.234					129.5	114.25					110
	6	131	99					216.465	75.941				229.792						193.286	70					93.429	102					165.633
	7	157	73.562					203.136	90.716				181.35						153.917	105					118.595	81.746					101
	8	110	95.5					226.121	99.806			Average	185.503	97.4849					144.457	96.222					131.8	94					171.077
	9	227.526						224.704	111.485										171	71.714					206.68	129.648					169.895
	10	112.48						226.27	108.751				139.75	87.143	1.7191				108.091	80.529					137.25	75.752					134.818
	11	139.741						222.56	59.757				255	135.568					171.811	65.07					117.335	94.308					108.421
	12	90.333						215	88.37				234.091	98					211.735	79.754					141.969	68.681					148
	13	177.65						96.196	122.141				247.25	127.526					135.75	91.437					121.5	90					108.667
	14	86.5						222.728	83.333				148.16	167.875					136	153					116.198						215
	15	132						219.833	79.135				234.462	144.093					96	94.686					122.345						138.741
	16	145.429						128.04	105.596				241	91					145	80.4					159.421						133.5
	17	136.588						137.187	112.843				141.5	129.02					99.25	107.454					144.053						157.188
		140.491	118.522					117.242	86.08				134.25	100.333					138.091	76.864					151.785						125.25
								149.97	75.143				194.714	109.769					105	67.907					159.975						163
	1	98.741	62	1.52841				177.667	99.427				203.727	112.741					65.842	54				average	134.958	102.514					161.846
	2	100	65.154					181.42	104.762				222.625	119.703					168	62.816											120.652
	3	74.667	64.148					232.581	108.906				245.24	126.331					183.97	57.296					189.312	60.182	1.90665			averag	159.465	82.7794
	4	122.444	73.111					211.689	113.653				186.242	77.83					119.353	43					129.5	111.581
	5	87.333	79.457					239.012	84.317				168.617						77.583	79.882					81.111	81.125					137.673	58.852	1.72529
	6	158.5	68.892					177.257	83.833			avergae	199.775	116.209					116.347	61.873					189.6	65.353					146.321	93
	7	81	81.264					215.111	107.389											71.684					131.6	56.923					112	77.582
	8	127	85.443					246.506	99.542				125.378	104.333	1.92235					62.333					140	52.769					111.519	54
	9	132	86.765					193.476	91				118.035	81.286						61.727					85	57					114.222	94.08
	10	77.793	69.868					244.062	112.333				162	89.344						50.4					124.803	83.391					182.311	61.111
	11	122.055	82.43					157.56	102.111				246.429	87.444						58.926					91.337	74.306					114.041	131.217
	12	127.588	73.5					210.807	100.57				144.969	90.069						65.24					91.5	57.413					156.041	152
	13	157.145	66.256					107.45	115.917				214.667	105.625						78.099					108.444	45					168.48	89
	14	84.342	94					211.149	90.723				124	113						74.778					95.775	58.55					156	118.066
	15	126	62.021					242.456	86				160.157	91.312						86					127	71.707					148	87.859
	16	113.765	52.421					224					110.5	61						87.883					145	40					225.331	110
	17	102.421	68					199.519					151.25	101.143				average	135.577	73.3827					144.654	71					174.931	120.615
	18	82.491	69.25					207.556					123.074	89.125											124.333	45					134.68	124.571
	19	76.5	97.077					177.786					127.63	87.667					251	103.099	2.16761				126.5	62.917					155.222	68.667
	20	131.875	57.551					179.339					193.429	108					188.917	90.8					155.915	54.13					153.556	76.347
	21	116	53.667					198.786					165.021	107.926					230.357	101.929					172.972	59.062					216.061	97
	22	86.014	59.923					216					155.918	101.8					235.13	118.647					114.183	92.68					128
	23		44.115					168.299					222.154	119					255	90					127.107	96.5					180
	24		86.47					226.46					229.672	73.6					246.348	105					118.923	81.956					132.188
	Average	108.44	70.9493					177.611					206.486	68.8					192	99.918					106.429	68.308					143.962
								196.058					198.786	82.2					233.889	83.95					171.32	66					239.333
	1	112.235	86.095	1.28088				229.333					234.73	83.215					248.444	120.683					110.959						193.426
	2	99.647	128.328					208.446					236.003						213.44	103.32				average	128.131	67.2022					105
	3	85.8	115.799					239.225					201.291						247.627	90											120
	4	210.918	113.538					205.852					133.231						196.932	146.28											195
	5	162	111.42					207.815					238.143						155.806	101.986					143.941	64.565	1.85545				199
	6	158.25	135.444					176.271					193						215	82.194					142.2	38.266					158
	7	111	103.855					253.402					189.444						191.765	109.947					114.231	52.5					151.561
	8	150	83.407					255					185						217.471	100					63.059	82.415					137.6
	9	99.037	86.116					223.111				average	177.422	92.2944					185.222	86.25					114	61.062					192.143
	10	114.579	89.413					186.69											184	109.098					214.118	72.505					173.695
	11	187.276	111.111					223.556					125.24	73	1.75882				137.98	66					144.784	67.71					204.347
	12	100.84	75.667					220.5					114.154	103.556					241.361	75.812					103.619	51					192.592
	13	110.048	61.489					253.933					114	111.636					220.125	80.645					137.022	88					220.4
	14	99.755	95.188					180.032					100.5	61.873					174.143	59.347					149.706	61.741					186.875
	15	122.667	130.5					159.982					167.835	78.219					168						107	62.786					191
	16	107.483						221.014					96.111	87					188.516						119	85.094					197.752
	17	165.791						208.317					117.644	140.474					186.857						128.2	92					139.837
	18	150.333						224					159.837	102					238.08						183.252	83.13				average	163.797	94.9392
	Average	130.425	101.825					231.904					183.22	81.347				Average	209.362	96.5866					121.926	87.117
								205.101					175.093	72											108.668	73.667					129.141	62	1.74978
		87.746	88.803	1.41863				195.667					143.5	104.6					184.75	74	2.22188					61.041					220.818	68.367
		86.738	69.667					186.811					147.911	86.935					228.923	60.38						97.222					255	97.75
		124.077	71.926					195.852					117.624	111.244					213.25	76.84						82.111					115.594	89
		119.505	111.815					192.111					136.091	107.76					198.969	82						69.908					252.636	89
		129.444	70.982					175.389					146.047	69.147					131.726	74						56.062					227.592	103.701
		73.487	97.259				Average	199.963	98.5096				219.935	67					141.72	54.058						57.667					178.254	79.727
		147.107	73.289										193.893	61.716					182.694	87.641						54.087					128.4	62.179
		131.867	69.333					132.25	84.476	1.67348			218.2	92					231	65.337						79.889					148	92.041
		90.14	68.636					113.238	79.515				205.65	81.5					219.625	90.762						73.6					136	119.702
		96.778	77.02					119.84	53.939				163.653	71					204.263	64.286						65.25					194.537	61.845
		139.54	90.67					130.333	72				133.76	84.864					231	74.526						84.72					196.6	98
		78.659	106					103.896	53.889				209.636	89.949					198.512	63				average	130.92	70.5598					148.016	136
		105.453	89.396					105.667	76.477				175.5						177.5	78											136.125	126.353
		140.815	82.484					85.185	79.852			average	155.001	88.1282					222.941	62.333					75.625	62.135	1.53228				138.349	129.224
		122.479	79.111					124.796	59.396										207.429	86.028					52.64	57.76					147.062	107.182
		123	108.433					119.222	73.865				150.593	55.77	2.00344				247.875	97.333					103	60.5					121.2	132.08
		153.796	82.185					150.794	69.22				141.521	73.643					132.891	84.6					114	56.184					176.714	103.906
		207.864						127.545	68.889				104	83.692					215.13	133					107.083	72					209.526	97.204
	Average	119.916	84.5299					115.16	79.946				154.505	72					199.429	129.765					119.25	58					179.24	77.453
								112.693	55.641				159.611	89					250.588	172					86.857	56.787					113	58
		121.75	75.802	1.42133				133	116.361				189.521	98.6					204.58	99.81					107.719	71.444					78	92.214
		124.751	93.564					139.778	79.333				127.188	68.07					225.579	110.12					144.975	56					165.256	61.778
		137.451	94					173.405	99.667				156	106.4					180	55.101					146.231	85.048					119.843	111.349
		191.903	82.872					158.639	95.781				126	70.02					168.52	62					99.333	84.556					101.379	89
		153.447	108.573					117.552	77.635				100.219	83					142.402	62					93.571	97					173.13	65.529
		171	74.85					164.222	84.105				166.471	94					212	103.041					65	73.944					169.833
		127.474	105.471					139.888	94.276				171.143	64.5					194.744	40.772					125	50.714					183.219
		121.23	110.556					189.597	81.091				211.88	55.98					190.462	92.339					87.333	65.951				average	162.231	92.7148
		182.589	92.235					112.048	59.926				138.333	78.653					93.64						67	66
		121.608	108.481					86.617	86.981				166	94.481					199.5						130	56.6					139.639	54.857	1.89928
		123	92.444					147.295					168.8	69.595					212						97.667	61.143					215.32	45.008
		130.746	93.778					156.333					195.673	75.939					200.222						127.429	87.868					149.959	94.538
		156.633	95.749					155.64					189						131.413						103	58.922					141.332	97
		98.875	153.556					154.8					182.675						134.818						73.982	52.591					101.296	69.2
		110.698	136.653					122.926					190						187.975							62.878					193.182	70
		134.917	132.56					83.837					224.333						149.138					average	101.271	66.092					214.5	84.019
		150.536	117.085					114.133					131.5						151.8												105.43	58.095
		130.389	86.844				Average	129.678	77.4896				255						159.667						171.769	54	1.59327				235.2	31.796
		179.469	138										161.551						136.111						133.835	96.97					133.667	61.667
		177.596						120.286	90	1.70704			224.758						231.5						113.812	60.8					250.74	74.308
		129.271						93.556	90.729				151.007						205.778						121	54.615					165.667	50
		179.095						108.25	66.726				130.778						187.625						143.321	68.5					175.938	52.321
		152.541						150.556	72.667				141						240.967						114	75.822					107	141.654
		233.333						121.333	84.968				168						220						100.356	77.644					186.684	100.077
		181.207						152.63	86.307				154.44						207.472						108.219	61.439					180	123.094
		176.086						171.569	87.554				69.533						113						122.538	97.5					157.92	92.875
		101						189.667	117.083				170.125						177.143						103	54.112					130.243	128.5
		163.444						155.031	125				100.538						148.077						73.375	104.602					115.408	85
		138.227						188.648	134.745				81						172.367						82.344	78.15					158.355	112.195
		172.556						148.651	69.531				146.99						158.176						82.094	43.983					172	115.637
		152.587						145	74.952			avearge	157.134	78.4319					166						104.903	22.5					156	116.25
		141						182.611	105.711										151.72						121.333	39.529					206.123	91.586
		153.733						182.489	80.222				177.254	83.686	1.68819				160						151.72	53					144.364	110.596
	Average	149.095	104.899					145	78				172.336	65.992					200.571						122.667	62.633					105	108.722
								168.235	76.017				220.615	74.765					168.5						106.636	56					181.667	89
		144.2	76.76	1.23249				166.859	78.918				213.397	58					182.639						162	58.132					215	116.5
		75.918	77.862					176.222	81.619				235.512	86.627					176						91	65.294					109	76.895
		111.837	84					129.29	86.48				154.667	110					170.026						138.211	55					207	65.02
		105.188	52					136.407					191.667	115.158					200.03						94.57	55.347					162.072	123.32
		148.787	86.241					148.937					221	106.294				Average	185.295	83.3954					89	84					187	126.923
		195.127	75.22					153.694					126	131											104.751	68.6					164.857	112.538
		188.061	124.681				Average	151.587	88.8015				136.564	113.074					182.667	112.063	1.80102				130.197	54.201					243.2	89
		151.577	143.634										185.657	108.785					202.49	103.123					82	75.667					167	83.071
		148.16	123.44					179.522	73.118	1.92026			131.497	136.416					136.265	86.761					60.184	90.176					203.32
		131.582	96.716					122.083	105.447				131.796	153.842					217.02	90					77.79	72.796					255
		80.687	106.429					143.667	101.778				175.219	61.25					208.877	114.176					77	77.735				average	170.447	89.743
		104.778	118.65					168.741	81.16				147.28	67.775					247.889	59.546					67.52	66.868
		93.635	87.599					231.827	71.026				122.637	85.615					133.573	57.373					96.64	68.574					108	126.8	1.9024
		118.683	127.095					169.143	125.1				177.75	66.88					191.04	76.667					77	65.154					117	79.594
		117.63	114.765					188.385	90.212				152.333	86.678					177.994	63.896					76.222	58.612					119.018	88.858
		95.06						170.87	89.244				132.923						194.877	59.136						71					115.837	59.76
		108.84						158.364	102.583				163.822						177.066							81.593					124.667	132.727
		84.224						241.308	86.741				172.331						237	59.333				average	106.091	66.5871					77	103
		148.719						136.556	105				153.88						238.593	62.333											145.429	119.615
		104.212						191.006	81.84				141.412						150.2						112.2	89.02	1.56339				155.2	90.333
	Average	122.845	99.6728					175.667	73.009				226.125						251.14	117.76					100	61.861					206.512	63.333
								161.667	48.6				177.889						249.08	180.507					113	69.917					152	79.077
		190.74	81.619	1.78749				158.778	58.444				121.4						241.6	154.811					135	83.25					212	70
		166.2	72.04					165.514	69.714				204.141						197.827	129.429					103.889	122.194					163.182	73.091
		134.778	68.44					153.963	99.429				127.927						251.891	148.387					148.75	103.118					180	104
		124.778	89.908					157.667	92.984				109.5						244.508	95.556					101.041	104.429					238	103
		110.576	135.667					152.096	67.524				68						237.914	154.171					101.545	75.231					181.667	105
		126.51	85.693					198.746	81.225				132						226.714	141.444					112.746	60.333					230	103.467
		116.667	93.807					177.093					133.08						223.596	155.908					131	98					132	86.824
		126.889	59.561					165.562				average	160.55	95.1021					244.583	110					157.938	108					226.882	132.182
		148.877	148.167					152.469											227.778	136.085					108	51.891					128	79.55
		122.333	77.694					208.667					75.148	36.214	1.9032				230.694	110.222					119.864	75.444					121.219	81.296
		101.667	62					157.646					95.381	74.4					197	101.431					97.88	64					217	117
		200.251	99.802					168.318					118.279	49					237.667	158.383					114	58.375					203.992	122
		213.506	72.822					115.429					186.564	50.661					163.949	106.494					105.6	53.657					254.5	57.246
		167.8	68.667					124.04					199.938	71.09					177.66	138.778					66	50.8					168
		135.055	60.176					111.746					167.172	124.799					219.074	109.544					141.909	69.262					249.947
		175.611	86.281					100					170.756	102.8					218.696	155.48					52.778	64.349					252.481
		153.208	73.054					165.778					167.181	118.81					197.199	156.207					83	59.372					216.964
		151.833	81.444				Average	163.623	85.2089				141.884	71.215					108.562	132.605					112.611	46.25					252.609
		186.308	90.722										239.081	88.784					129.871	100.472					144.408	38					189.018
		180.333						124.346	145.438	1.52908			115.619	88.125					196.74	135.833					88.667						255
		141.37						167.905	142.444				167	90.952						134.905					115.875						193.512
		159.091						138.543	103.824				120.778	88.081						107.963					161						133.44
		144.068						144.223	125				143.125	100.917						88.604					140						225
	Average	151.237	84.6086					199.333	127.612				193.208	70.959				Average	204.703	113.659				average	114.181	73.0342					178.485
								166.702	123.822				115.667	72.245																	152
		158.429	130.97	1.33722				139.359	138.854				142.556	88.75					241.444	78.533	2.6213				122.381	57.995	1.62251				168
		152.945	137.667					183.937	115.034				161.037	117.569					249.854	64.222					129.112	58.097					188.231
		108.717	97.476					197.481	147.388				160.417	58.889					208.861	56.167					114.923	64.4					183.058
		153.663	112.542					232.538	136.586				128.514	78.293					207.2	155.815					173.256	56.074					227.667
		167.827	131.629					189.127	87.807				168						253.186	131.027					169.5	79.347					162.643
		126.479	111.489					152.479	103.16				158.704						244.21	130.917					122.852	83.5				average	180.129	94.6849
		96.041	132.68					156.594	66.198				184						253.443	104.768					115.273	92.594
		179.524	133.416					198.014	92.444				111.333						207.142	85.942					130.455	85.878					154.066	67.868	2.15805
		164.051	150.667					190.88	133.801				181.667						208.644	88.333					107.5	113.444					231.249	61.438
		205.444	134					141.267	96.657				111.133						166.673	83.235					164.8	76.118					170.836	89.68
		158.364						146.787	89.556				130.63						244.85	76.593					151	77.242					221.531	90.5
		198.889						201.846	111.083				186.796						135.148	102.469					78.279	120.426					255	54.737
		240.539						175.827	74				177.795						240.06	48.583					120	140.5					134.76	62
		157.911						167.556	90				162.456						212.609	51.222					107.5	127.814					208.26	35.762
		159.223						162.19	86				187.58						235	55.729					125.803	66					151.012	52.531
		162.778						153.518	100.154				146.364						183.32	58.827					142.172	84.143					213.093	71.833
		203.893						171.817	96.106				132.153						137.02	48.28					102	53.766					219.149	70.449
		222.667						131.778	124.289				160.221						255	43.96					111.734	65.6					161.463	109.8
		191.851						129.088	82.19				185.667						230.605	41.506					148	73.8					191	60.56
		174.022							92.103				150.418						236.083	85.827						53.619					210.059	119.333
		204.333					Average	166.525	108.906				163.827						173.667	54.526						59.6					183.882	120
		124.744											155.387						234.714	111.222						72					223.469	107.152
		166.887						144.2	76.612	1.39752			137						224.228	96.722						63					191.969	85.766
		190.615						141.58	105				251.773						165.745	71.769						87					208.333	201.204
		109.556						96.815	90			avearge	156.305	82.1276					250.193	53.926						64.706					193.618	102.941
		236.259						144.111	82.163										234.532	47.16						72.188					246.903	101.759
		157.32						126.667	131.12				197.1	147.67	1.453				249.619	40.93						102.704					196.521	125.48
		191.667						142.778	69				145	99.63					255	46.667						71.668					220.424	78
	Avergae	170.166	127.254					140.128	99.36				178.111	120.9					143.988	78						68.857					251.286	104.055
								117.742	114.719				244.685	132.882					224.899					average	128.239	79.0372					195.694	80.562
		206.078	73.361	1.44335				161.444	84				176.75	109.77					188												175.059
		143.111	90.611					174.247	129.245				248.653	84.49					206.222						146.603	80.818	1.60365				230
		197.84	93.333					140.427	84.545				255	130.87					229.422						143.182	69.947					128.42
		213.018	99.333					153.724	121.9				255	100.2					226.68						79.035	72					173.757
		223.502	79.611					162.206	106.118				183.562	101.529					231.306						195.75	78.25					192.333
		168.444	114.689						80.698				197.491	119.322					238.556						88.12	82.471					148
		154	120.556						118.714				255	155.667					251.68						120.308	90.333					193.314
		178.444	113.605						109.5				255	116					126.23						151.333	67.202					141
		157.364	130.238						123.083				255	149.813					240.854						86.667	58.75					149.909
		145.631	138.507						106.176				201.141	146					234.547						124.667	88.636				average	192.668	89.2787
		165.218	125.333						100.48				230.338	194					219.857						78.312	97
		225.667	142.067						69.014				157.658	145.609					170.815						136.148	74.391					149.622	116.222	1.96731
		180.79	111.147						101				247	157					206.667						167.346	94.941					108	132.268
		166.83	180.033						140.5				255	235.429					127.327						113.568	63.421					185.667	100.538
		129.444	137.953						82.745				219.579	133.669					134.752						118.75	65.447					246.24	151.482
		181.004	127.111						113				191.333	126.48					156.333						134	87.218					183.333	55.089
		153.547	128.704				Average	142.005	101.612				181.467	121.939					120.5							129					149.728	58.444
		176.559	119.453										210	178					100.722							59.626					109.84	89.579
		141	170.128					170.8	108.83	1.84793			187	198					199.694							71.25					242.871	79.388
		136.435						110.444	105.227				186.812	175.75					164.984							71.5					174.407	84.574
		131.778						142.235	70.063				180	147.047					144.901							82.4					236.444	104.823
		186.718						190.767	86.96				199	176.625					122.778							74.24					177.111	107.141
		242.778						160.636	70.214				135	135					130.389							64.037					151.837	87.136
		209.615						140.405	84.527				180.385	149.741					120.111					average	125.586	78.3126					98.444	93.25
		126.975						185.778	74				134.184	121.463					192.749												142.889	82.389
		211.111						168.351	107.547				198.51	149.664					208.16						135.938	80.827	1.37231				114.488	92
		162.333						174.667	102.128				193.02	129.755					118.6						150.524	71.878					163.333	70.835
		212.37						215.333	131.417				225.959	144.375					206.788						131.462	126.158					185.16	59.497
		217.389						137.133	104.535					121.406					192.19						92.148	138.029					150.265	57.333
		156.554						221.528	94.227			avearge	204.992	141.082					174.056						133.6	100.633					140.512	98.001
		189.388						227	108.819									Average	198.213	75.6164					92.645	99.314					161.179	53.852
		152.333						192.273	66.75				188	82.208	1.70087										128.773	65.198					195.5	65.117
		119.333						197.62	121.629				140.007	110.058					117.281	55.167	1.86132				142.623	104.28					219.111	65.914
		167						244.633	120.45				142.938	108.142					81.615	54.061					127.684	120.667					142.2	73
	Average	174.4	120.83					163.21	94.785				188.653	104.429					118.724	72.744					105.73	87					118.493	46.948
								159.559	95.299				208.356	118					131.787	57					108.408	69.182					108.449
		161.037	129.881	1.51606				183.893					168	107					92.333	67.936					109.816	94.198					202.8
		144.782	136.045					236.333					195.536	130					122.157	83.44					164.854	97.101					166.4
		184.329	88.848					184.347					154.158	91.615					143.157	59.562					211.149	77.421					101.496
		186.167	129.044					231.067					255	130.975					177.722	67.458					129	129.566					184.167
		117.51	113.408					190.83					152.918	77.444					141.938	92.825					158	97.667					154.423
		178.544	79.427					218.333					255	114					110.679	81.048					186.182	64.664					128.074
		204.184	79.677					161.542					170.444	113.312					108.867	67.58					140.594	104.336					209.348
		153.879	94.769					200.605					209.429	107					160.444	54.778					156.75	88					157.37
		172.653	103.963					161.501					151.678	93					148.353	53					109.571	97.25					245.75
		185.277	99.617					161.395					227.012	87.926					107.5	85.706					104.095	107.578					132.083
		111.222	107.974					146.383					156.44	98.385					109	60.641					112.332	69.529					153.392
		154.665	108					162					170.333	101.515					121.741	67.485					121.453	90.406					249.654
		119.667	125.44					207.765					130.2	113					108.798	82.863					109.018	63.868					65.396
		130.83	88.98					198.667					134.462	98					154.765	67.896						115.286					224.729
		110.959	80.426					161.333					157.533	72.157					105.185	53.143						136.389					192.583
		176.264						115.425					132.333	76.188					132.481	60.81				average	131.765	96.0163					174.979
		157.407						155						117.178					142.815	65.691											178.506
		191.133					Average	179.394	97.0782					85.128					132.097	69.858					100.796	58.64	1.873				128.391
		165.778												141.692					163.354	72.104					48	57					198.667
	Average	158.226	104.367					223.128	95.573	1.76552		avearge	175.64	103.265					150.458	78.889					123.151	44.308					138.933
								229.222	49.833										167.71						66	36.222					192.667
								225.722	101.751				255	58	1.70907				197.219						86.265	41.746				average	165.977	84.3675
								212.083	73.353				136.152	85.846					182.593						100.333	35
								201.36	95.059				113.065	111.376					114.273						139.391	78					142.449	96.375	1.96071
								181.333	88.667				141	107.857					107.083						100.041	46.793					165.122	82.353
								123.146	102.969				133.286	87.214					187.544						87.184	83					152.763	65.951
								143.37	83.317				180.298	149.873					122.658						119	73					142	105.503
								152.182	71.313				222.444	107.294					114.678						109	50.812					203.306	95.4
								126.989	77.753				204	137.5					129.209						110.221	72					116.385	96.733
								157.259	87.333				110.636	158.551					131.222						108.824	77					156	113.938
								153.425	70.444				233.533	73.878					142.515						66.413	70					163.516	73.213
								170.19	113.889				139.988	106.344					149.309						173	49.143					134.858	86.267
								175.333	82.284				210.769	151.545					111.827						121.286	72					230	77.5
								180.775	121.607				211.346	116.489					92.476						198.63	69.292					153.094	58
								148.774	86.833				222.23	184					105						141.939	62.235					213.182	83.639
								156.359	110.744				177.094	108.415					93.5						65.078						209.545	102.456
								182.748	96.136				221.176	80.524					158.222						82.714						195.49	124.02
								144.038	86.118				255						110.667						109						175.969	82
								131.173	109.393				159.524						132.221						195.053						174.25	70.595
								198.755	109.896				217.732						90.471						107.01						186.32	78
								186.757	97.001				210.96						119.667						109.969						187.5	90.833
								148.374	117.655				172.012						110.926						131.296						146.625	81
								104.856	94.444				194						99.25					average	111.984	59.7884					232	48.122
								181.717	88.222				124						153.022												169.778	99.778
								111	94				156.545						121.595												152.716	80.814
								152.556	137.462				192.509						88.883												119.429	66
								174.467	152.806				213.917						140.889												148.8	65.275
								177.333	135.45				251.512						140.889												120	63.6
								172.555					178						45.4												131.5	62
								106.679					131.469						106.466												200.143	99.604
								140.111					225						134.037												199.667	74
								157					216.37						117.223												180.8	76.84
								137.6					203						111.174												238	76
								145.622					187.017					Average	126.545	67.9869											156.727	90.947
								213.463					235.68																		243	119.286
								189.872					234.735																		253.333	71.083
								198.803					255																		174.533	58
								124.897					230.207						157.667	96.568	1.88018										193.399	77.644
								189.333					183.422						95.26	101											108.286	82.05
								226.857					188.7						117.402	120.827											138.316	138.5
								210.042					174.645						97.63	114.22											195	80.364
								119.351					253.531						155.222	90.468											173	101.211
								247					215.314						95.444	125.593											166.777	99.125
								217.867					207.582						154.505	151.513											153.333
								197.029					237.107						204.667	96.059											138.353
								247.614					208.48						219.333	121											108
								142.08					183						171.222	84.454											131.471
								208.787					189						226.586	114.169											165
								171.493					171.941						168.5	72.146											120.898
							Average	172.37	97.6312				194.4						248.235	97.516											91.444
													194.041						209.583	126.333											134.667
								228.544	108.11	1.81477			165.669						243.181	129.107											104.235
								170.952	74.889				204.751						183.63	119.632											138.36
								163.737	135.58				226.5						227.94	82.606											249.776
								213.818	102.667				228.25						125.222	91.162											186
								214.025	87.896				197.735						245.612	72.222											152.337
								166.063	80.496				134.667						231.074	77										average	166.367	84.8505
								210.136	107.778			average	194.91	114.044					154.889	65.963
								157.17	125.26										213.469	51.833											88.049	87.65	2.20025
								181.532	94.667				169	150.32	1.71237				221.657												118.58	44.632
								229.481	98				190.74	91.545					241.435												88	47.833
								151.93	69.556				146.844	152.523					215.189												74	54.122
								235.167	92.154				78.089	93.194					230.889												104.917	60.531
								160.854	90.959				172	87.182					198.836												109.25	62.718
								193.333	73.041				171.797	97.235					183.062												77.51	63.884
								181.455	61.579				181.52	97					210.44												122.9	52.667
								155.519	63.207				201.375	111.2					192.031												171.222	90
								159.979					127.639	141.826					195.062												192.656	94
								202.294					162	84					184.222												38.032	68.815
								189.611					126.667	82					228.769												145.286	67.669
								121.318					207.333	84.719					176.25												180.633	63.538
								143.222					218	120.947					203.565												137.407	62
								159.28					146	72.143					187.63												152.5	58
								173.994					245.256	103.684					146.358												150.833	45.714
								135.48					128.438	110.824					189.909												145	51.474
								116.254					184.265	71.75					195.174												196.6	59.357
								166.424					174.926	123					193.185												145	37.225
								129					181.286	94.562					221.444												148.5
								125.275					159.459	145.938					200.6												170.781
								192					230.471	83.812					169.869												153
								139.444					192.444	89.5					177												227.316
								133.77					159.314	100					157.311												128.265
								143.846					216.333	90.84				Average	188.137	100.063											128.036
								176.997					186.75	127.554																	133.942
								183.069					241	117.593					142.983	53.895	1.78874									average	135.701	61.6752
								110.372					189.611						118.312	93.201
								127.667					137.148						91	60											229.844	62.025	2.21909
								151.094					221.294						83.606	50.952											255	87.585
								181.028					234.25						100.42	102.333											255	60.222
								171.046					245.815						92.923	63.485											222	90.75
								104.235					142						98.834	67.726											125.071	71.6
							Average	166.26	91.6149				195.626						94	66.048											170	70
													173.38						113.612	31											185.578	52.421
								212.37	110.511	1.83944			169.645						102.4	49											228.903	96.438
								219.333	145.711				128.905						90.524	52.383											175	74
								192.419	77.2				165						91.095	71.838											249.333	82.6
								130.222	95.795				199						118.971	66.667											134.25	88.814
								172.541	120.438				140.385						113.178	45.761											179.16	99.111
								102	84.37				140.2						105.667	93.673											139.802	137
								191.361	71.44				144.077						109.568	68.056											111.339	110.184
								189.383	94.781				158.281						101.889	54.5											221.118	74.237
								181.948	76.579				255						140.6	41.307											142.5	65.52
								215.826	73.339				218.667						51.533	47.141											229.685	99.667
								222	69.172				180.778						134.133	57.123											229.895	68.5
								168.571	104.234				206.568						174.13	72.619											100.504	113.059
								160.457					190.143						86.306	72.286											144.429	85
								156.167				avearge	179.462	104.803					138.593	84.359											161.531	65.834
								132.538											103.2	88.061											125.918	59.588
								149.667											112.84	52.498											109.8	74
								166.268											150.75	120.553											235	86
								151.333											124.959	64.024											234.578	58
								173.716											90.639	42.38											213.917	54.75
								193.785											119.377	78.613											119	42
								203.667											160.167	52.436											151	69.692
								172.96											171.585	42.306											107.698
								196.461											165.63	53.583											164.333
								201.333											97.778	100.055											162.391
								149.034											165.375	56.627											119.96
								198.583											147.146	78.239											116.571
								178											123.625	68.58										average	174.246	78.5213
								180										Avergae	117.426	65.6474
								118.055
								141.76											228.111	126.333	2.15188										173.182	51.301	1.68831
								159.625											194.053	100.173											71.462	103.76
								186.059											222.944	65.874											133.671	113.661
								122.848											161.178	63.67											173.526	43.5
								164.513											161.479	94											114.571	55.727
								190.8											146.314	67.432											143.645	107.4
								155.111											188.299	58.371											152	80
								156.991											237.833	77.456											132.444	54
								186.963											188	78											187.765	65.812
							average	172.228	93.6308										243.446	64.338											137.407	113.889
																			218.619	74.42											99.4	102.073
								180.796	125.569	1.49435									203.289	77.736											193.857	106.113
								179.997	169.098										236.702	70.126											146.667	108.218
								206.293	154.111										152.738	67.605											110.802	62.654
								181.98	125.107										182.728	80.748											155.398	84.36
								187.185	166.037										160.259	76.101											143.03	84.148
								245.583	126.6										189.976	60.222											223.277	66.837
								160.698	150.981										194.4	51.961											201.76	68.154
								207.936	208.583										155.444	71.645											81.917	58.816
								239	95.998										185.148	100											110.714	95.5
								176.273	85.111										143.583	119.8											139.978
								212.247	145.922										191	85.978											132
								237.112	100.187										141.556	140.111											120.636
								135.593	90.444										194.667	84.122											122.5
								218.089	101.955										225.592	107.4											179.412
								159.011	121.769										215.148	89.755											153.333
								183.792	85.761										214.957	88.701											96.571
								117.203	109.227										203.884	122.091											109.96
								150.5	79.969										173.167	104.378											87.714
								191.156	113.657										115.667	107.214											89
								176.512	89.864										199.248	90.7										average	137.253	81.2961
								187.59	77.111										220.432	112.111
								103.903	88.884										176.644	68.988
								109.21											137.286	112.84
								138.204											219.467	128.429
								149.548											185.778	108.843
							average	177.416	118.725										233.96	102.733
																			234.355	93.381
																			170.381	97.179
																			245.667	79.26
																			252.172	137.605
																			221.038	90.479
																			222.556
																			200.785
																			173.383
																			252.87
																			161.056
																			169.722
																			134.116
																			202.667
																			148.431
																			136.4
																			169.333
																			247.889
																			223.667
																			199.238
																			155.523
																			237.176
																			255
																			220
																		Average	194.607	90.4359
																			169.167	71.333	1.85357
																			199.2	65.148
																			211.333	96.071
																			168.5	78.571
																			123.667	66
																			208.391	76.769
																			141.909	105
																			156.5	62
																			157.692	97.52
																			232.837	94.667
																			237	112.269
																			247	94
																			201.704	82
																			200	105
																			243.558	92.571
																			210.497	70
																			211.2	184.438
																			211.077	110.9
																			125.562	230
																			223.571	197.333
																			220.25	196
																			199.592	167.218
																			224.9	245.716
																			197.5	90
																			208.333	70.632
																			246.263	82
																			236.095	47
																			194.805	124.706
																			190.21
																			172.562
																			255
																			241.188
																			236.533
																			204
																			255
																			208.308
																			255
																			255
																			177.463
																			250.059
																			220.5
																			200.312
																			198.8
																			219.074
																			120.76
																			184
																			157.859
																			173.846
																			239
																			202.8
																			180.75
																			207.388
																			249
																			212.078
																			196.64
																			250.347
																			198.88
																			223
																			235
																			200
																			232.538
																			234.6
																			183.211
																			168
																		Average	206.2	111.245
																			216	93.333	1.71271
																			126.6	48.967
																			149	77.807
																			126.636	101
																			139.4	54.204
																			109	60.031
																			86	54.798
																			124.5	77
																			135.824	99.2
																			131.593	90.28
																			127.756	47
																			178.158	115
																			80.588	90
																			195.156	116.059
																			121.544	145.017
																			109.111	101.25
																			105.077	107.886
																			118.172	103.033
																			156.917	95.038
																			109.46	58
																			139.222	48.741
																			150.465	63.57
																			186.156	94.667
																			100.786	66
																			116.556	79.103
																			174.4	84.014
																			239	124.13
																			69.778
																			178.462
																			140.157
																			150.5
																			113
																			99.412
																			178.4
																			231.105
																			160.18
																			188.669
																			255
																			131.353
																			220
																			86.361
																			159.25
																		Average	145.588	85.0047
