# Supplementary material for: The Arabidopsis V-ATPase is localized to the TGN/EE via a seed plant-specific motif
Source: eLife. 2020 Nov 25;9:e60568. doi: 10.7554/eLife.60568 (PMC7717909; doi:10.7554/eLife.60568)
Supplement: Figure 7—figure supplement 1—source data 1. [file elife-60568-fig7-figsupp1-data1.xlsx]

## Sheet: Sheet1
			Rosette areas (mm2)
		Col-0	vha-a2 vha-a3	VHA-a3-GFP #4-2	VHA-a1-GFP #2-1	E161S #7-1	E156Q + L159T #10-2	ELE #12-4	delta EEI #14-4
	1	4519.49	397.313	3908.29	485.137	763.072	1882.59	1889.58	3465.4
	2	4174.78	421.139	4221.19	418.662	602.285	1677.87	1844.6	2705.16
	3	3936.62	334.504	3243.39	398.997	869.026	2253.85	1917.66	2296.1
	4	2877.53	407.864	4147.24	578.855	671.038	2285.6	1805.96	2212.79
	5	3830.37	299.83	5012.85	389.536	712.102	2130.56	2102.08	2279.86
	6	3911.26	355.357	5158.87	605.802	741.575	1795.07	1387.35	2930.73
	7	4393.52	378.886	4622.37	428.024	917.371	2077.81	2007.12	3042.63
	8	4291.88	331.383	4799.31	540.664	684.709	1470.87	2135.12	3164.29
	9	4125.69	370.416	3201.19	384.285	862.636	1506.68	1481.37	2433.66
	10	3927.76	348.819	4040.2	460.32	604.761	2104.16	1680.49	4239.47
	11	4298.67	515.501	4245.42	538.089	770.899	1853.57	1959.96	2561.01
	12		331.234	3799.46	554.534	800.916	1960.86	2078.2
	Average	4026.14	374.354	4199.98	481.909	750.032	1916.62	1857.46	2848.28
	std dev	440.882	56.9354	625.722	79.1711	101.348	270.086	237.373	613.797
