# Supplementary material for: The Arabidopsis V-ATPase is localized to the TGN/EE via a seed plant-specific motif
Source: eLife. 2020 Nov 25;9:e60568. doi: 10.7554/eLife.60568 (PMC7717909; doi:10.7554/eLife.60568)
Supplement: Figure 7—source data 1. [file elife-60568-fig7-data1.xlsx]

## Sheet: Rosette area 7B
	Rosette area (mm2)
No.	Col-0	vha-a2 vha-a3	VHA-a3-GFP #4-2	E161S-#7-1	ELE #16-1	L159T + E161S # 10-8	delta EEI# 14-4
1	8019.33	257.03	7362.18	609.055	2669.5	2477.26	5025.91
2	7478.06	332.485	6206.89	662.566	3982.61	2668.9	5962.94
3	6277.39	156.172	7027.14	881.116	3740.91	2836.95	6354.95
4	8790.72	168.648	6384.41	814.98	3740.31	3387.53	5733.72
5	7843.77	335.792	7773.57	613.865	5041.84	3379.87	6795.06
6	7272.59	246.358	6114.75	1047.36	4016.28	2148.23	5255.73
7	7951.54	155.721	7734.04	794.387	4336.89	3234.07	8111.77
8	8963.12	222.909	7510.08	735.015	2582.47	2951.03	7069.82
9	7920.88	200.664	8557.44	844.29	3372.5	3824.93	8839.12
10	8987.33	164.289	6602.66	752.752		2847.77	5903.87
11		234.634	6776.42	1048.56			5500.14
12		421.318		647.234
Average	7950.47	241.335	7095.42	787.598	3720.37	2975.65	6413.91
std deviation	837.022	84.0651	765.133	150.668	774.894	492.659	1198.85

## Sheet: Cell sap pH 7C
										Average	std deviation
Col-0	5.86	5.89	5.93	5.64	5.62	5.7	5.63	5.7	5.67	5.73778	0.121221
vha-a2 vha-a3	6.53	6.48	6.45	6.39	6.32	6.37	6.1	6.13	6.3	6.34111	0.147855
VHA-a3-GFP#4-2	5.86	5.92	5.9	5.68	5.69	5.67	5.7	5.74	5.71	5.76333	0.100623
L159T + E161S #10-8	6.13	6.2	6.18	5.89	6.03	6.04	6.09	5.86	5.88	6.03333	0.130384
L159T + E156Q + E161S #16-1	6.07	6.15	6.07	5.99	5.94	6.03	5.82	5.94	5.8	5.97889	0.116667
delta EEI #14-4	6.13	6.15	6.14	5.73	5.79	5.96	5.7	5.91	5.79	5.92222	0.182125
