# Supplementary material for: The Arabidopsis V-ATPase is localized to the TGN/EE via a seed plant-specific motif
Source: eLife. 2020 Nov 25;9:e60568. doi: 10.7554/eLife.60568 (PMC7717909; doi:10.7554/eLife.60568)
Supplement: Figure 8—source data 1. [file elife-60568-fig8-data1.xlsx]

## Sheet: Sheet1
Cell Sap pH
	Col-0	vha-a2 vha-a3	VHA-a3-GFP #4-2	MpVHA-a #13-6	MpVHA-a #16-2
	5.69	6.24	5.71	5.69	5.65
	5.62	6.21	5.6	5.61	5.62
	5.68	6.3	5.7	5.74	5.75
	5.8	6.38	5.79	5.66	5.61
	5.73	6.43	5.85	5.77	5.74
	5.79	6.38	5.8	5.85	5.78
Average	5.71833	6.32333	5.74167	5.72	5.69167
std deviation	0.0691134	0.0873308	0.0897589	0.0853229	0.073598
