# Supplementary material for: The Arabidopsis V-ATPase is localized to the TGN/EE via a seed plant-specific motif
Source: eLife. 2020 Nov 25;9:e60568. doi: 10.7554/eLife.60568 (PMC7717909; doi:10.7554/eLife.60568)
Supplement: Figure 10—figure supplement 1—source data 1. [file elife-60568-fig10-figsupp1-data1.xlsx]

## Sheet: Rosette area
Genotypes	Col-0	vha-a2/+ vha-a3/+	vha-a2 vha-a3	vha-a1/+	vha-a1	vha-a1/+ vha-a2/+ vha-a3/+	vha-a1 vha-a2/+ vha-a3/+
	15.4108	16.8285	2.30335	14.0461	12.9518	8.55447	0.64901
	12.6945	9.35733	2.80641	10.5758	8.44025	9.49297	0.43424
	10.7824	10.3803	2.30134	11.8157	11.2447	15.1083	1.20256
	13.0859	12.2856	1.90647	17.6468	8.68754	12.4814	4.03253
	12.0608	12.2721	2.37592	13.4681	12.1764	14.9728	0.67271
	11.4743	12.4199	3.15241	13.0144	10.1816	17.4558	0.32712
	13.2494	12.9151	1.84755	9.91355	14.0519		3.85498
	17.3075	9.1518	2.26907	8.16575			1.08865
	13.5879	11.8519	2.63154	16.6236			1.12537
	11.7371	11.0168	1.76186	12.9596			0.569879
	9.43719	9.55243	1.40873				0.974371
	12.9872	8.192	1.65099				0.459849
	5.21277	14.3024	1.65291
	7.87074	14.5458	1.63016
	7.00051	6.64398	1.43833
	12.6239	11.2112	1.50397
	10.2174	12.2729
		7.68827
		13.535
		12.7383
		13.6494
		17.9252
		17.7481
		13.4472
		15.8556
		8.7159
		7.38116
		14.8896
		11.0404
		12.6233
Average	11.573	12.0812	2.04006	12.823	11.1049	13.0109	1.28261
Std dev	2.99479	2.96968	0.524527	2.90403	2.12366	3.47912	1.27686
