# Supplementary material for: The Arabidopsis V-ATPase is localized to the TGN/EE via a seed plant-specific motif
Source: eLife. 2020 Nov 25;9:e60568. doi: 10.7554/eLife.60568 (PMC7717909; doi:10.7554/eLife.60568)
Supplement: Figure 10—source data 1. [file elife-60568-fig10-data1.xlsx]

## Sheet: Hypocotyl length
Hypocotyl length
	Absolute values (cm)														Relative values (%)
	1st measurement		2nd measurement		3rd measurement			1st measurement		2nd measurement		3rd measurement			1st measurement		2nd measurement		3rd measurement			1st measurement		2nd measurement		3rd measurement
	DMSO control		DMSO control		DMSO control			125 nM ConcA		125 nM ConcA		125 nM ConcA			DMSO control		DMSO control		DMSO control			125 nM ConcA		125 nM ConcA		125 nM ConcA
	Col-0	vha-a1; VHA-a1-GFP/vha-a1-GFP	Col-0	vha-a1; VHA-a1-GFP/vha-a1-GFP	Col-0	vha-a1; VHA-a1-GFP/vha-a1-GFP		Col-0	vha-a1; VHA-a1-GFP/vha-a1-GFP	Col-0	vha-a1; VHA-a1-GFP/vha-a1-GFP	Col-0	vha-a1; VHA-a1-GFP/vha-a1-GFP		Col-0	vha-a1; VHA-a1-GFP/vha-a1-GFP	Col-0	vha-a1; VHA-a1-GFP/vha-a1-GFP	Col-0	vha-a1; VHA-a1-GFP/vha-a1-GFP		Col-0	vha-a1; VHA-a1-GFP/vha-a1-GFP	Col-0	vha-a1; VHA-a1-GFP/vha-a1-GFP	Col-0	vha-a1; VHA-a1-GFP/vha-a1-GFP
	0.92	0.896	1.022	0.709	0.837	0.486		0.693	0.567	0.428	0.08	0.672	0.069		94.5529	92.0863	119.895	83.1758	120.856	70.1742		71.223	58.2734	50.2105	9.38514	97.031	9.963
	0.938	0.685	0.901	0.782	0.752	0.599		0.585	0.243	0.551	0.127	0.532	0.084		96.4029	70.4008	105.7	91.7397	108.582	86.4904		60.1233	24.9743	64.6401	14.8989	76.8162	12.1289
	0.907	0.851	0.766	0.838	0.721	0.625		0.608	0.103	0.42	0.397	0.68	0.076		93.2169	87.4615	89.8627	98.3093	104.106	90.2446		62.4872	10.5858	49.272	46.5737	98.1861	10.9737
	0.864	0.767	0.89	0.735	0.762	0.557		0.7	0.188	0.468	0.335	0.525	0.458		88.7975	78.8284	104.41	86.2259	110.026	80.426		71.9424	19.3217	54.903	39.3003	75.8054	66.1312
	1.2	0.732	0.79	0.813	0.805	0.601		0.444	0.448	0.624	0.365	0.673	0.1		123.33	75.2312	92.6782	95.3764	116.235	86.7792		45.6321	46.0432	73.2041	42.8197	97.1753	14.4391
	0.788	0.846	0.786	0.755	0.553	0.486		0.454	0.451	0.627	0.092	0.771	0.362		80.9866	86.9476	92.209	88.5722	79.8484	70.1742		46.6598	46.3515	73.556	10.7929	111.326	52.2697
	1.142	0.792	0.827	0.604	0.584	0.529		0.839	0.377	0.552	0.091	0.489	0.181		117.369	81.3977	97.0188	70.8578	84.3245	76.383		86.2282	38.7461	64.7574	10.6756	70.6073	26.1348
	1.027	0.682	1.036	0.777	0.75	0.607		0.715	0.097	0.592	0.165	0.515	0.099		105.55	70.0925	121.538	91.1531	108.293	87.6455		73.4841	9.96917	69.45	19.3568	74.3615	14.2947
	1.149	0.71	0.75	0.768	0.604	0.484		0.668	0.109	0.655	0.427	0.68	0.084		118.088	72.9702	87.9856	90.0973	87.2123	69.8854		68.6536	11.2025	76.8408	50.0932	98.1861	12.1289
	0.876	0.794	0.711	0.772	0.673	0.573		0.512	0.366	0.491	0.131	0.558	0.366		90.0308	81.6033	83.4104	90.5666	97.1753	82.7362		52.6208	37.6156	57.6013	15.3682	80.5703	52.8472
	0.835	0.847	0.913	0.755	0.807	0.546		0.497	0.103	0.782	0.119	0.623	0.303		85.8171	87.0504	107.108	88.5722	116.524	78.8377		51.0791	10.5858	91.7397	13.9604	89.9558	43.7506
	0.996	0.839	0.892	0.791	0.628	0.574		0.656	0.454	0.688	0.367	0.659	0.086		102.364	86.2282	104.644	92.7955	90.6777	82.8806		67.4203	46.6598	80.7122	43.0543	95.1539	12.4177
	1.281	0.85	0.896	0.716	0.608	0.716		0.604	0.132	0.828	0.12	0.606	0.253		131.655	87.3587	105.114	83.997	87.7899	103.384		62.0761	13.5663	97.1362	14.0777	87.5011	36.531
	0.838	0.685	0.743	0.748	0.71	0.664		0.616	0.135	0.545	0.151	0.592	0.068		86.1254	70.4008	87.1644	87.751	102.518	95.8758		63.3094	13.8746	63.9362	17.7144	85.4796	9.81861
	0.903	0.542	0.887	0.703	0.65	0.641		0.563	0.117	0.642	0.108	0.687	0.089		92.8058	55.704	104.058	82.4719	93.8543	92.5548		57.8623	12.0247	75.3157	12.6699	99.1968	12.8508
	0.905	0.74	0.871	0.725	0.637	0.593		0.675	0.308	0.762	0.438	0.443	0.182		93.0113	76.0534	102.181	85.0528	91.9773	85.624		69.3731	31.6547	89.3934	51.3836	63.9653	26.2792
	0.972	0.584	0.81	0.839		0.69			0.084		0.407		0.486		99.8972	60.0206	95.0245	98.4266		99.63			8.63309		47.7469		70.1742
		0.893		0.795		0.633			0.116		0.413		0.093			91.778		93.2648		91.3997			11.9219		48.4508		13.4284
		0.761		0.714		0.602			0.135		0.107		0.128			78.2117		83.7623		86.9236			13.8746		12.5526		18.4821
		0.559		0.758		0.539			0.379		0.411		0.313			57.4512		88.9242		77.8269			38.9517		48.2161		45.1945
		0.805		0.781		0.7			0.51		0.1		0.327			82.7338		91.6224		101.074			52.4152		11.7314		47.216
		0.868		0.735		0.55			0.281		0.07		0.304			89.2086		86.2259		79.4152			28.8798		8.21199		43.895
		0.804		0.814		0.588			0.089		0.336		0.08			82.631		95.4938		84.9021			9.14697		39.4176		11.5513
		0.871		0.693		0.567			0.117		0.331		0.263			89.517		81.2987		81.8699			12.0247		38.831		37.9749
		0.681		0.667		0.729			0.143		0.392		0.512			69.9897		78.2486		105.261			14.6968		45.9872		73.9283
		0.873		0.788		0.626			0.463		0.114		0.044			89.7225		92.4436		90.389			47.5848		13.3738		6.35322
		0.74		0.883		0.482			0.357		0.107		0.086			76.0534		103.588		69.5966			36.6906		12.5526		12.4177
		0.807		0.777		0.642			0.094		0.118		0.064			82.9394		91.1531		92.6992			9.66084		13.8431		9.24104
		0.733		0.715		0.709			0.085		0.403		0.173			75.334		83.8796		102.373			8.73587		47.2776		24.9797
		0.858		0.648		0.571			0.108		0.366		0.084			88.1809		76.0196		82.4474			11.0997		42.937		12.1289
		0.701				0.58			0.459		0.379					72.0452				83.747			47.1737		44.4621
		0.786				0.594			0.382							80.7811				85.7684			39.26
									0.138														14.1829
									0.136														13.9774
Average	0.973	0.768187	0.852412	0.753267	0.692563	0.596344		0.614313	0.243353	0.603438	0.244097	0.606562	0.1939		100	78.9504	100	88.3689	100	86.1068		63.1359	25.0106	70.7918	28.636	87.5823	27.9975
