# Supplementary material for: The Arabidopsis V-ATPase is localized to the TGN/EE via a seed plant-specific motif
Source: eLife. 2020 Nov 25;9:e60568. doi: 10.7554/eLife.60568 (PMC7717909; doi:10.7554/eLife.60568)
Supplement: Supplementary file 1. [file elife-60568-supp1.xlsx]

## Sheet: Legend to Supplemental tables
Supplemental Tables
Table 1.	Statistical support for the predicted structural homology models obtained from I-TASSER
Table 2.	Overview of the number of VHA-a isoforms in plants with VHA-a isoforms that do not contain the a1-TD
Table 3.	Overview T1 analysis CRISPR/Cas9 VHA-a1 lines
Table 4.	Segregation of vha-a1-1
Table 5.	Chimeric proteins overhangs and primers
Table 6.	GreenGate modules and constructs
Table 7.	CRISPR/Cas9 gRNA sequences and genotyping primers

## Sheet: Table 1
Supplemental Table 1: Statistical support for the predicted structural homology models obtained from I-TASSER
Subunit a N-terminal domain	Template	Quality of predicted model
		C-Score	TM-Score
VHA-a1NT	PDB: 607U:a	-0.36	0.67 ± 0.13
VHA-a3NT	PDB: 607T:a	-0.1	0.70 ± 0.12

## Sheet: Table 2
Supplemental Table 2: Overview of the number of VHA-a isoforms in plants with VHA-a isoforms that do not contain the a1-TD
Classification	Species	Number of VHA-a isoforms
Ferns	Azolla filliculoides	2
	Salvinia cucullata	1
Lycophyte	Selaginella moellendorffii	2
Bryophytes	Anthocerous angustus	2
	Physcomitrella patens	5
	Sphagnum fallax	3
	Marchantia polymorpha	1
Charophytes	Klebsormidium nitens	1
	Chara braunii	1
Chlorophytes	Chlamydomonas reinhardtii	3
	Volvox carteri	2
	Coccomyxa subellipsoidea	1
	Dunaliella salina	1
	Micromonas pusilla	1
	Micromonas sp RCC299	1
	Ostreococcus lucimarinus	1

## Sheet: Table 3
Supplemental Table 3: Overview T1 analysis CRISPR/Cas9 VHA-a1 lines
CRISPR gRNAs 1+2	means of analysis	number of analyzed plants	number of plants with deletion in one allele of endogenous VHA-a1	number of plants with deletion in both alleles of endogenous VHA-a1
in Col-0	PCR to detect deletion between CRISPR site 1 and 2	40	0	0
in VHA-a1:VHA-a1-GFP	PCR to detect deletion between CRISPR site 1 and 2	60	3	0
in UBQ10:VHA-a1-GFP	PCR to detect deletion between CRISPR site 1 and 2	9	1	1
CRISPR gRNA 3	means of analysis	number of analyzed plants	number of plants with pollen phenotype	comments
in Col-0	observation of pollen phenotype	20	5	1 plant: homozygous vha-a1-3
in VHA-a1:VHA-a1-GFP	observation of pollen phenotype	20	2
CRISPR gRNA 4	means of analysis	number of analyzed plants	number of plants with pollen phenotype	comments
in Col-0	observation of pollen phenotype	20	3	1 plant: homozygous vha-a1-4
CRISPR gRNAs 1+2	means of analysis	number of analyzed plants	number of plants with pollen phenotype	comments
in Col-0	observation of pollen phenotype	50	2

## Sheet: Table 4
Supplemental Table 4: Segregation of vha-a1-1
wildtype x VHA-a1-GFP in vha-a1-1	F2 analyses
	Observed		Expected
	Absolute experimental values [number of plants]	Relative experimental values [%]	Inheritance of vha-a1-1 via both gametophytes [%]	Inheritance of vha-a1-1 only via one gametophyte [%]
wildtype	7	14	6.25	8.33
vha-a1-1	0	0	6.25	0
vha-a1-1/+	3	6	12.5	8.33
wildtype; VHA-a1-GFP	12	24	18.75	25
vha-a1-1; VHA-a1-GFP	6	12	18.75	16.67
vha-a1-1/+; VHA-a1-GFP	22	44	37.5	41.67
(wildtype x VHA-a1-GFP in vha-a1-1) x wildtype	F1 analyses
	Observed		Expected
	Absolute experimental values [number of plants]	Relative experimental values [%]	Inheritance of vha-a1-1 via both gametophytes [%]	Inheritance of vha-a1-1 only via female gametophyte [%]
wildtype	9	30	25	25
vha-a1-1	0	0	0	0
vha-a1-1/+	6	20	25	25
wildtype; VHA-a1-GFP	8	26.6667	25	25
vha-a1-1; VHA-a1-GFP	0	0	0	0
vha-a1-1/+; VHA-a1-GFP	7	23.3333	25	25
wildtype x (wildtype x VHA-a1-GFP in vha-a1-1)	F1 analyses
	Observed		Expected
	Absolute experimental values [number of plants]	Relative experimental values [%]	Inheritance of vha-a1-1 via both gametophytes [%]	Inheritance of vha-a1-1 only via female gametophyte [%]
wildtype	6	21.4286	25	33.33
vha-a1-1	0	0	0	0
vha-a1-1/+	0	0	25	0
wildtype; VHA-a1-GFP	11	39.2857	25	33.33
vha-a1-1; VHA-a1-GFP	0	0	0	0
vha-a1-1/+; VHA-a1-GFP	11	39.2857	25	33.33

## Sheet: Table 5
Supplemental Table 5: Chimeric proteins overhangs and primers
Unique overhangs for VHA-a1/VHA-a3 Chimeras
Chimera	Unique Overhang
a1NT35*a3-GFP	-CTTA
a1NT85*a3-GFP	-AAGC
a1NT131*a3-GFP	-TATA
a1NT179*a3-GFP	-CAGG
a1NT288*a3-GFP	-TCAT
* The numbers refer to the length of the VHA-a1 sequence
Primers used to amplify the VHA-a1 N-termini and VHA-a3 C-termini
No	PCR fragment	5' to 3'	Sequence
1	VHA-a1 NT 35 aa	Forward	GAT CGG TCT CGA ACA ATG GAG GAA TTC TTA GAT AA
		Reverse	GAA CGG TCT CGT AAG TGA TGG AAC GAT GAG CGG AT
2	VHA-a1 NT 85 aa	Forward	GAT CGG TCT CGA ACA ATG GAG GAA TTC TTA GAT AA
		Reverse	GAA CGG TCT CGG CTT TGT CAA TTT GAT CTT TAA AA
3	VHA-a1 NT 131 aa	Forward	GAT CGG TCT CGA ACA ATG GAG GAA TTC TTA GAT AA
		Reverse	GAA CGG TCT CGT ATA TGT CTG CCG AAG CTT TTC AC
4	VHA-a1 NT 179 aa	Forward	GAT CGG TCT CGA ACA ATG GAG GAA TTC TTA GAT AA
		Reverse	GAA CGG TCT CGC CTG CTC AAG TAA AGA GGC AGT CT
5	VHA-a1 NT 228 aa	Forward	GAT CGG TCT CGA ACA ATG GAG GAA TTC TTA GAT AA
		Reverse	GAA CGG TCT CGA TGA TTT CCT CAT CAG AGG TTG TT
6	VHA-a3 CT 2352 aa	Forward	GAT CGG TCT CGC TTA CCT TGG AGA TCT TGG CCT CG
		Reverse	GAA CGG TCT CGC TGA CTC GTC TTC GTT TGC CGT GA
7	VHA-a3 CT 2214 aa	Forward	GAT CGG TCT CGA AGC AGG AGT TCC AGC CAA GGA AA
		Reverse	GAA CGG TCT CGC TGA CTC GTC TTC GTT TGC CGT GA
8	VHA-a3 CT 2077 aa	Forward	GAT CGG TCT CGT ATA ATG AGC TTA TGG AGT ACA AG
		Reverse	GAA CGG TCT CGC TGA CTC GTC TTC GTT TGC CGT GA
9	VHA-a3 CT 1936 aa	Forward	GAT CGG TCT CGC AGG AAG AGA AGT CCA TTG ATT CG
		Reverse	GAA CGG TCT CGC TGA CTC GTC TTC GTT TGC CGT GA
10	VHA-a3 CT 1782 aa	Forward	GAT CGG TCT CGT CAT TGA TCC CAA CTC TGG GGA GA
		Reverse	GAA CGG TCT CGC TGA CTC GTC TTC GTT TGC CGT GA
Primers used to amplify VHA-a3 N and C-terminal fragments and the a1-TD
No.	PCR fragment	5' to 3'	Sequence
1	VHA-a3 N-terminus	Forward	TAT GGT CTC AGG CTC AAC AAT GGC GGA AAG TGG CGG TGG
		Reverse	AAC AGG TCT CAC CTT CTG AAG AAC CAA CTT GTA CT
2	a1-TD	Forward	AAC AGG TCT CAA AGG CAA GTG GTT TCC TTG TCT CA
		Reverse	AAC AGG TCT CAA AAG AGG CAG TCT CAA TAA AAC CG
3	VHA-a3 C-terminus	Forward	AAC AGG TCT CAC TTT GTT AC AGG AAG AGA AGT CCA
		Reverse	GAA CGG TCT CGC TGA CTC GTC TTC GTT TGC CGT GA
Primers used to amplify different fragments of VHA-a1
No	PCR fragment	5' to 3'	Sequence
1	VHA-a1 NT (Y5)	Forward	GAT CGG TCT CGG GCT CAA CAA TGG AGG AAT TCT TAG ATA A
		Reverse	AAC AGG TCT CAC GTA AGC ATC AAT AAT CTC CTG GAA
2	VHA-a1 Y2	Forward	GAT CGG TCT CGC AGG AAA TGA ATC CTG GAC ACT CT
		Reverse	AAC AGG TCT CAC GTA AGC ATC AAT AAT CTC CTG GAA
3	VHA-a1 dodo	Forward	AACAGGTCTCATCATGGATCCTTCAACATCAGAAATG
		Reverse	AACAGGTCTCACGTAAGCATCAATAATCTCCTGGAA
4	Intron 10	Forward	AAC AGG TCT CAT ACG GGT TAG TTC CAC TTT TGA TCA
		Reverse	AAC AGG TCT CAG CAA CAC TGC CAA GTA AGT ATC ATG
5	VHA-a1 CT	Forward	AAC AGG TCT CAT TGC GAG ATA TCA AGA GGC AAA CC
		Reverse	GAA CGG TCT CGC TGA GAT TAA AGC GAA AGA GAA AG
Primers used to for Site directed mutagenesis of VHA-a1 and VHA-a3
No.	PCR fragment	5' to 3'	Sequence
1	E156Q	Forward	CTC ATG CAA TTG GAG AAC AAA TTG AAC TAC ATG AAA GC
		Reverse	GCT TTC ATG TAG TTC AAT TTG TTC TCC AAT TGC ATG AG
2	E161S	Forward	GAA GAA ATT GAA CTA CAT TCA AGC ACC TAC TCG AAT AAC GG
		Reverse	CCG TTA TTC GAG TAG GTG CTT GAA TGT AGT TCA ATT TCT TC
3	F134Y	Forward	CAT ATA ACG AAC TTC TAG AAT ACA AGA TAG TTC TTG AAA AGG
		Reverse	CCT TTT CAA GAA CTA TCT TGT ATT CTA GAA GTT CGT TAT ATG
4	L159T	Forward	GGA GAA GAA ATT GAA ACA CAT GAA AGC ACC TAC TCG
		Reverse	CGA GTA GGT GCT TTC ATG TGT TTC AAT TTC TTC TCC
5	L159T + E156Q	Forward	GGA GAA CAA ATT GAA ACA CAT GAA AGC ACC TAC TCG
	* template was No.4	Reverse	CGA GTA GGT GCT TTC ATG TGT TTC AAT TTG TTC TCC
6	L159T + E161S	Forward	GGA GAA GAA ATT GAA ACA CAT TCA AGC ACC TAC TCG
	* template was No.4	Reverse	CGA GTA GGT GCT TGA ATG TGT TTC AAT TTC TTC TCC
7	E156Q + E161S + L159T	Forward	GCA ATT GGA GAA CAA ATT GAA ACA CAT TCA AGC ACC TAC TCG
	* template was No.6	Reverse	CGA GTA GGT GCT TGA ATG TGT TTC AAT TTG TTC TCC AAT TGC
8	E156 deletion	Forward	TAC TCA TGC AAT TGG AGA AAT TGA ACT ACA TGA AAG C
		Reverse	GCT TTC ATG TAG TTC AAT TTC TCC AAT TGC ATG AGT A
	E155 + E156 deletion	Forward	TAC TCA TGC AAT TGG AAT TGA ACT ACA TGA AAG C
		Reverse	GCT TTC ATG TAG TTC AAT TCC AAT TGC ATG AGT A
	E155 + E156 + I157 deletion	Forward	AAT ACT CAT GCA ATT GGA GAA CTA CAT GAA AGC AC
		Reverse	GTG CTT TCA TGT AGT TCT CCA ATT GCA TGA GTA TT
Primers used to create VHA-a3-R729N
No	PCR fragment	5' to 3'	Sequence
1	VHA-a3 SacI/SalI	Forward	ATACCGCGGATGGCGGAAAGTGGCGGTG
		Reverse	TCACGGCAAACGAAGACGAGAGTCGACTAT
2	VHA-a3 R729N	Forward	GGGCAAGACTGAGAGCCCATAGATTCAGGTAAG
		Reverse	CCATAGATTCAGGTAAGAAGCGGTGTTGGAAACAGCTCC
3	GFP5-SalI/Pstl	Forward	CCGGTCGACACCCGGGGATCCAAGGAGATATAATC
		Reverse	TTACTGCAGCTCTTATTTGTATAGTTCATCCATGCC
Primers used to amplify Sar1BH74L synthesized fragment
No.	PCR fragment	5' to 3'	Sequence
1	Sar1BH74L	Forward	AAC AGG TCT CAG GCT CAA CAA TGT TCT TGG TAG ATT GGT T
		Reverse	GAA CGG TCT CGC TGA CTT GAT ATA CTG AGA CAT CC
Primers used to amplify MpVHA-a for expression in Arabidopsis
No	PCR fragment	5' to 3'	Sequence
1	MpVHA-a NT	Forward	AACAGGTCTCAGGCTCAACAATGGTGCAAATGGAGCTTTTC
		Reverse	AACAGGTCTCACGTAGGCATCGACGATCTCCTGG
2	MpVHA-a CT	Forward	AACAGGTCTCATTGCACGATACCAGGAGGCCAAT
		Reverse	AACAGGTCTCACTGAATCATCTTCTTCCGAGAGG
Primers used to amplify MpVHA-a for expression in Marchantia
No	PCR fragment	5' to 3'	Sequence
1	MpVHA-a	Forward	CACCATGGTGCAAATGGAGCTTTTCCGCTCG
		Reverse	ATCATCTTCTTCCGAGAGGGTGGCAAAAG
2	mVenus-AscI	Forward	AAGGGTGGGCGCGCCATGGTGAGCAAGGGCGAGGAG
		Reverse	AGCTGGGTCGGCGCGTTACTTGTACAGCTCGTCCATGC
Primers used to amplify Amborella, Pine and Sellaginella VHA-a N-termini
No	PCR fragment	5' to 3'	Sequence
1	A.trichopoda-VHA-a-NT	Forward	AACAGGTCTCAGGCTCAACAATGAATTTGCTCAAGGATT
		Reverse	GAACGGTCTCGATGACATATTCGTCAAGAGGTGC
2	P.taeda-VHA-aNT	Forward	AACAGGTCTCAGGCTCAACAATGGGAGGCAGCAGAAGC
		Reverse	GAACGGTCTCGATGACATGTTCCTCAACTGCTAC
3	S.moellendorffii-VHA-aNT	Forward	AACAGGTCTCAGGCTCAACAATGCCGAAGATGCATCTGT
		Reverse	GAACGGTCTCGATGACTCGCTCGTCAAGTGGTAC
Primers used to amplify VHA-a3 to create pGGC-VHA-a3 (pKSC003)
No	PCR fragment	5' to 3'	Sequence
1	VHA-a3	Forward	TAT GGT CTC AGG CTA TGG CGG AAA GTG GCG GTG G
		Reverse	TGT GGT CTC ACT GAT CCC TCG TCT TCG TTT GCC GTG AAA
Primers used to amplify rat sialyltransferase (ST) to create pGGC-ST (pKSC013)
No	PCR fragment	5' to 3'	Sequence
1	ST	Forward	AAC AGG TCT CAG GCT CAA CAA TGA TTC ATA CCA ACT TGA A
		Reverse	AAC AGG TCT CTC TGA CAT GGC CAC TTT CTC CTG GC
Primers used to amplify pmScarlet-I and mVenus to create pGGD-GSL-pmScarlet-I and pGGD-GSL-mVenus
No	PCR fragment	5' to 3'	Sequence
1	pmScarlet-I/mVenus	Forward	AAC AGG TCT CAT CAG GTG CTA GCG GTG GCA GCG GTG GCA CTA GTG GTG GAG GCG GAT CCA TGG TGA GCA AGG GCG AGG
		Reverse	AAC AGG TCT CTC TGA CTT GTA CAG CTC GTC CAT G
Primers used to generate destination vector pGGZ004
No	Purpose	5' to 3'
1	To introduce Eco31I sites	Eco31I-w-AG-Fw	ACCAGGTACCACCTTGAGACCGAATTCGCTCGATCGCTCGAGGGTCTCAGTATTCTAGACCAAGCA
		Eco31I-w-AG-Rv	ACCAGGTACCACCTTGAGACCGAATTCGCTCGATCGCTCGAGGGTCTCAGTATTCTAGACCAAGCA
2	To mutate an internal Eco31I site	pGGZ004SDM1-Fw	AAGGTCGAAAAGGTGTCTTTCCTGTGGATAGCACG
		pGGZ004SDM1-Rv	CGTGCTATCCACAGGAAAGACACCTTTTCGACCTT

## Sheet: Table 6
Supplemental Table 6: GreenGate modules used to create constructs
Entry modules
Plasmid ID	Entry modules name	Reference
pGGA006	UBQ10 promoter	Lampropoulos et al., 2013
pGGA016	pOp6	Schürholz et al., 2018
pGGB003	B-Dummy	Lampropoulos et al., 2013
pGGC000	entry module C	Lampropoulos et al., 2013
pKSC003	pGGC-VHA-a3	this study
pKSC012	pGGC-VHA-a1-intron 10	this study
pKSC013	pGGC-ST	this study
pGGC018	GR-LhG4	Schürholz et al., 2018
pGGD001	linker GFP	Lampropoulos et al., 2013
pGGD004	linker-CFP	Lampropoulos et al., 2013
pGGD011	GFP (A206K) no linker	Lampropoulos et al., 2013
p2456	GSL-mVenus	this study
p1324	GSL-pmScarlet-I	this study
p2897	GSL-mCherry	Waadt et al., 2017
pGGE001	rbcS terminator	Lampropoulos et al., 2013
p1296	HSP18.2M terminator	Waadt et al., 2017
pGGF001	BastaR	Lampropoulos et al., 2013
pGGF012	SulfR	Lampropoulos et al., 2013
pGGF007	KanR	Lampropoulos et al., 2018
p1317	HygR_pNos	Waadt et al., 2017
pGGF005	HygR_pUbq10	Lampropoulos et al., 2013
pGGG001	F-H adapter	Lampropoulos et al., 2013
pGGG002	H-A adapter	Lampropoulos et al., 2013
pGGM000	intermediate vector M	Lampropoulos et al., 2013
pGGN000	intermediate vector N	Lampropoulos et al., 2013
pKSM002	UBQ10:GR-LHG4:trbcS	this study
pKSN009	pOP6:Sar1BH74L-CFP	this study
pGGZ001	destination vector	Lampropoulos et al., 2013
pGGZ003	destination vector	Lampropoulos et al., 2013
pGGZ004	destination vector	this study
GreenGate reactions
Composition of entry and intermediate modules
pKSC003	pGGC-VHA-a3
	VHA-a3
	pGGC000
pKSC012	pGGC-VHA-a1-intron10
	VHA-a1 NT (Y5)
	Intron 10
	VHA-a1 CT
	pGGC000
pKSC013	pGGC-ST
	ST
	pGGC000
pKSM002	UBQ10:GR-LHG4:trbcS
pGGA006	UBQ10 promoter
pGGB003	B-dummy
pGGC018	GR-LhG4
pGGD002	D-dummy
pGGE001	rbcS term
pGGG001	F-H adapter
pGGM000	intermediate vector
pKSN009	pOP6:Sar1BH74L-CFP
pGGA006	pOp6
pGGB003	B-dummy
-	Sar1BH74L
pGGD004	linker CFP
pGGE001	rbcS term
pGGF005	SulfR
pGGG002	F-A adapter
pGGN000	intermediate vector
Composition of destination vectors
	UBQ10:VHA-a1-VHA-a3-GFP	(Chimeras)
pGGA006	UBQ10 promoter
-	VHA-a1-NT*	* various lengths
-	VHA-a3-CT*
pGGD001	linker GFP
pGGE001	rbcS term
pGGF005	HygR_pUbq10
pGGZ001	destination vector
	UBQ10:VHA-a3-a1-TD-GFP
pGGA006	UBQ10 promoter
pGGB003	B-dummy
-	VHA-a3-NT
-	a1-TD
-	VHA-a3-CT
pGGD001	linker GFP
pGGE001	rbcS term
pGGF012	SulfR
pGGZ001	destination vector
	UBQ10:VHA-a1-intron10*-GFP	(*VHA-a1 with various mutations)
pGGA006	UBQ10 promoter
pGGB003	B-dummy
-	VHA-a1 Y2
-	Intron 10
-	VHA-a1-CT
pGGD001	linker GFP
pGGE001	rbcS term
pGGF005	HygR_pNos
pGGZ001	destination vector
	Dex:Sar1BH74L-CFP
pKSN009	pOP6:Sar1BH74L-CFP
pKSM002	UBQ10:GR-LHG4:trbcS
pGGZ003	destination vector
	UBQ10:MpVHA-a-mVenus
pGGA006	UBQ10 promoter
pGGB003	B-dummy
-	MpVHA-a-NT
-	VHA-a1-intron10
-	MpVHA-a-CT
p2456	GSL-mVenus
p1296	HSP18.2M
p1317	HygR_pNos
pGGZ004	destination vector
	A.trichopoda-VHA-a-NT-VHA-a1-mCherry
pGGA006	UBQ10 promoter
pGGB003	B-dummy
-	A.trichopoda-VHA-a-NT
-	VHA-a1 dodo
-	VHA-a1-intron10
-	VHA-a1-CT
p2897	GSL-mCherry
p1296	HSP18.2M
p1317	HygR_pNos
pGGZ004	destination vector
	P.taeda-VHA-a-NT-VHA-a1-mVenus
pGGA006	UBQ10 promoter
pGGB003	B-dummy
-	P.taeda-VHA-a-NT
-	VHA-a1 dodo
-	VHA-a1-intron10
-	VHA-a1-CT
p2456	GSL-mVenus
p1296	HSP18.2M
p1317	HygR_pNos
pGGZ004	destination vector
	S.moellendorffii-VHA-a-NT-VHA-a1-mCherry
pGGA006	UBQ10 promoter
pGGB003	B-dummy
-	S.moellendorffii-VHA-a-NT
-	VHA-a1 dodo
-	VHA-a1-intron10
-	VHA-a1-CT
p2897	GSL-mCherry
p1296	HSP18.2M
p1317	HygR_pNos
pGGZ004	destination vector
	UBQ:VHA-a1-GFP
pGGA006	UBQ10 promoter
pGGB003	B-dummy
pKSC012	VHA-a1-intron 10
pGGD011	GFP (A206K)
pGGE001	rbcS term
pGGF007	KanR
pGGZ001	destination vector
	UBQ:VHA-a3-pmScarlet-I
pGGA006	UBQ10 promoter
pGGB003	B-dummy
pKSC003	VHA-a3
p1324	pmScarlet-I
p1296	HSP18.2M
pGGF007	KanR
pGGZ004	destination vector
	UBQ:ST-GFP
pGGA006	UBQ10 promoter
pGGB003	B-dummy
pKSC013	ST
pGGD011	GFP (A206K)
pGGE001	rbcS term
pGGF001	BastaR
pGGZ003	destination vector

## Sheet: Table 7
Supplemental Table 7: CRISPR/Cas9 gRNA sequences and genotyping primers
gRNA sequences CRISPR VHA-a1
No.	Name	Sequence
1	gRNA1	GTCTCATGTCAGTTGTCGAC
2	gRNA2	GAGCTCGCCGAGATAAGTGA
3	gRNA3	GATCACCTGCTCAAGTAAAG
4	gRNA4	GAATTGCTATCCTGTCCCCG
Primers for genotyping PCRs
Genotyping PCRs	Forward primer	Reverse primer	PCR product length (bp)
CRISPR site 1 and 2 (VHA-a1 specific)	CCACCAGACTTATACCGGACG	GCAACACCAATTGAAATCCGC	635
CRISPR site 2 (VHA‑a1-GFP specific)	CTGAGTTTTTCTGATTAACAAACA	CGTGGTGAACATCTTAGACC	329
CRISPR site 2 (VHA‑a1 specific)	GACGGGAACAAAAACTGAACTC	GCAACACCAATTGAAATCCGC	546
CRISPR site 3	CCTTGTCTCAAGTAATACTCATG	GATGTTGAAGGATCCATGATTTC	358
CRISPR site 4	GAAATCATGGATCCTTCAACATC	TTAAGCTATAGCCAACAGAATTAAG	553
Cas9 specific	AACCCCATTAATGCGTCAGGCG	GTCAATGTACCCAGCGTAGCCG	498
VHA-a2 specific	CTCTCTCCATGATCGTCTCTCTCG	GCGGTAGCACTTCTATGGGCTG	898
vha-a2 specific	GCGTGGACCGCTTGCTGCAACT	GCGGTAGCACTTCTATGGGCTG	678
VHA-a3 specific	GAACGAACGATGGCG GAAAG	TGAATGTACCTGTGCTGCGT	565
vha-a3 specific	GAACGAACGATGGCG GAAAG	GCGTGGACCGCTTGCTGCAACT	264
	=
